# Supplementary material for: Determining the Effect of Pterostilbene on Insulin Secretion Using Chemoproteomics
Source: PubMed Central journal article supplement (PMC7356329; doi:10.3390/molecules25122885), 2020-06-23

## Supplementary Information

### **Determining the Effect of Pterostilbene on Insulin Secretion using Chemoproteomics**

**Chiara Cassiano, Daniela Eletto, Alessandra Tosco, Raffaele Riccio, Maria Chiara Monti, Agostino Casapullo**

## Chemoproteomics

Figure S1: MSMS spectrum of the PTS-DSP adduct (3) at r.t. of 30 min (see Figure 1).  $MH^+$  of PTS-DSP is 546.09 u.m.a; its main fragment at 431.08 u.m.a. corresponds to the loss of *N*-hydroxysuccinimide.

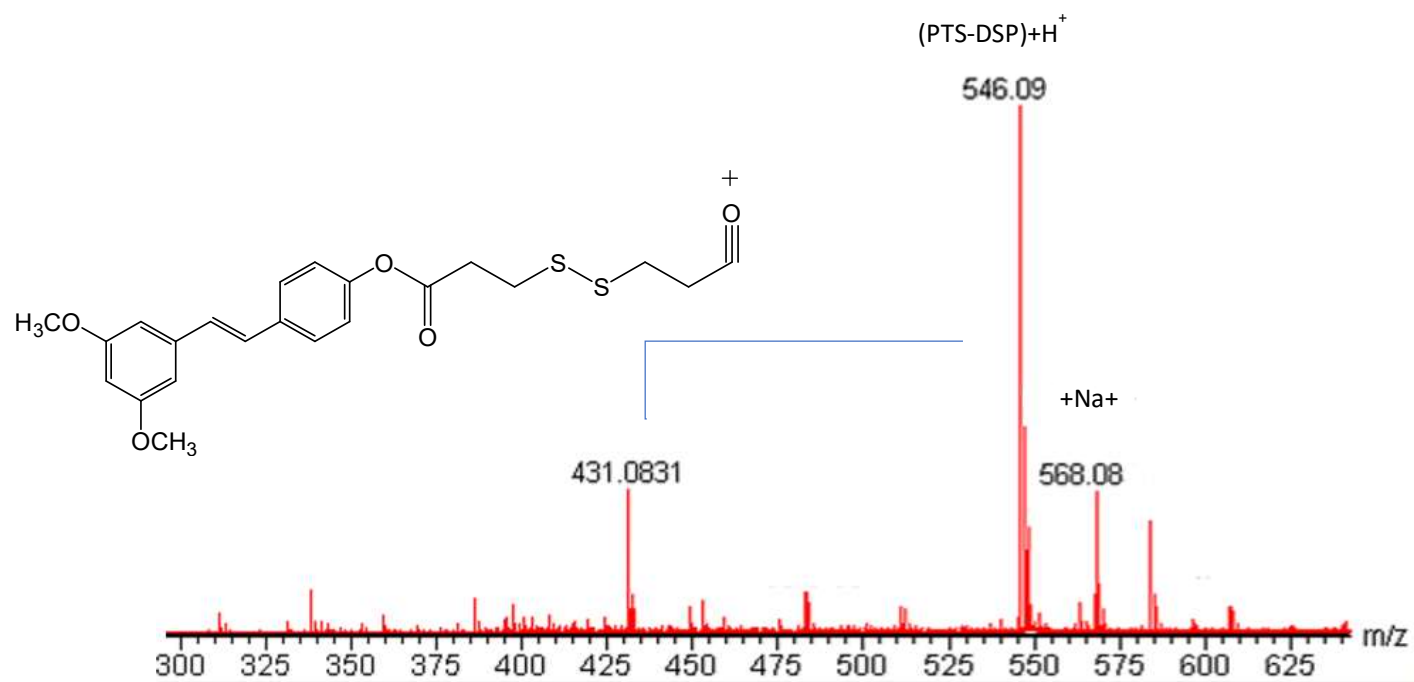

MWD1 A, Sig=220,8 Ref=360,50 (Pst001.D)  
MWD1 B, Sig=280,8 Ref=360,50 (Pst001.D)

Figure S2: PTS-DSP adduct stability in PBS buffer at 0 and 2h incubation

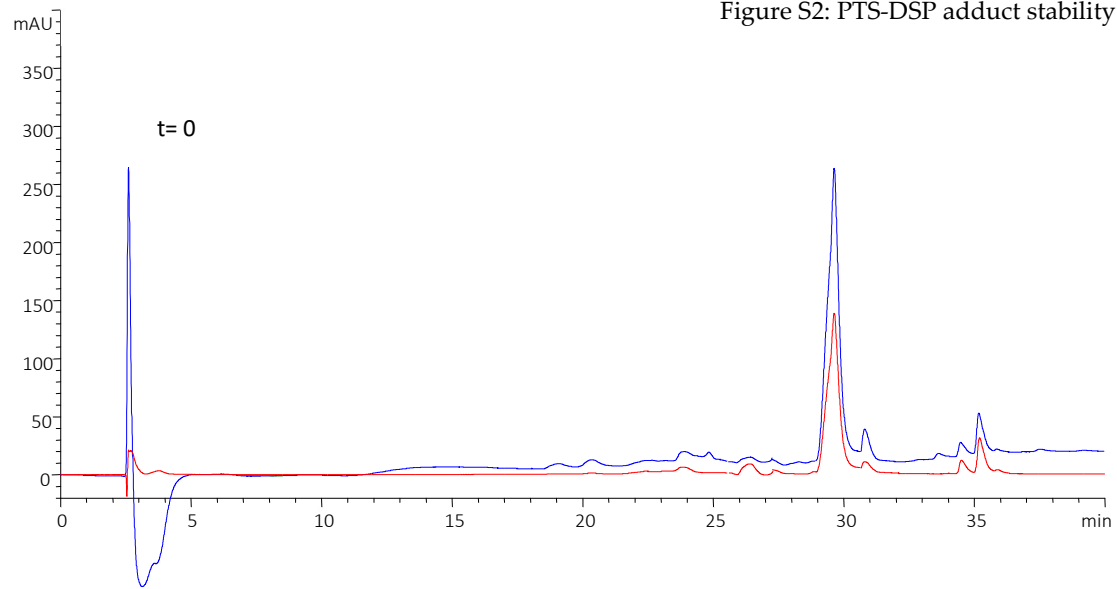

MWD1 A, Sig=220,8 Ref=360,50 (Pst002.D)  
MWD1 B, Sig=280,8 Ref=360,50 (Pst002.D)

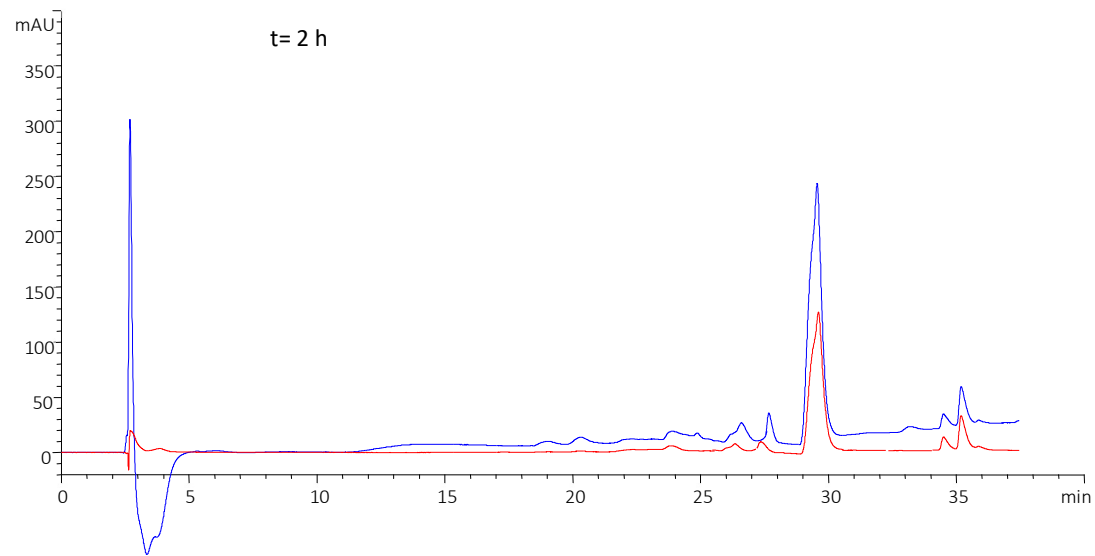

Figure S3: RP-HPLC-UV trace at 220 nm of PTS-DSP adduct in the supernatant of the reaction mixture with the agarose solid Carboxylink support at time 0 (on the left) and after 16 h of incubation at r.t. (on the right)

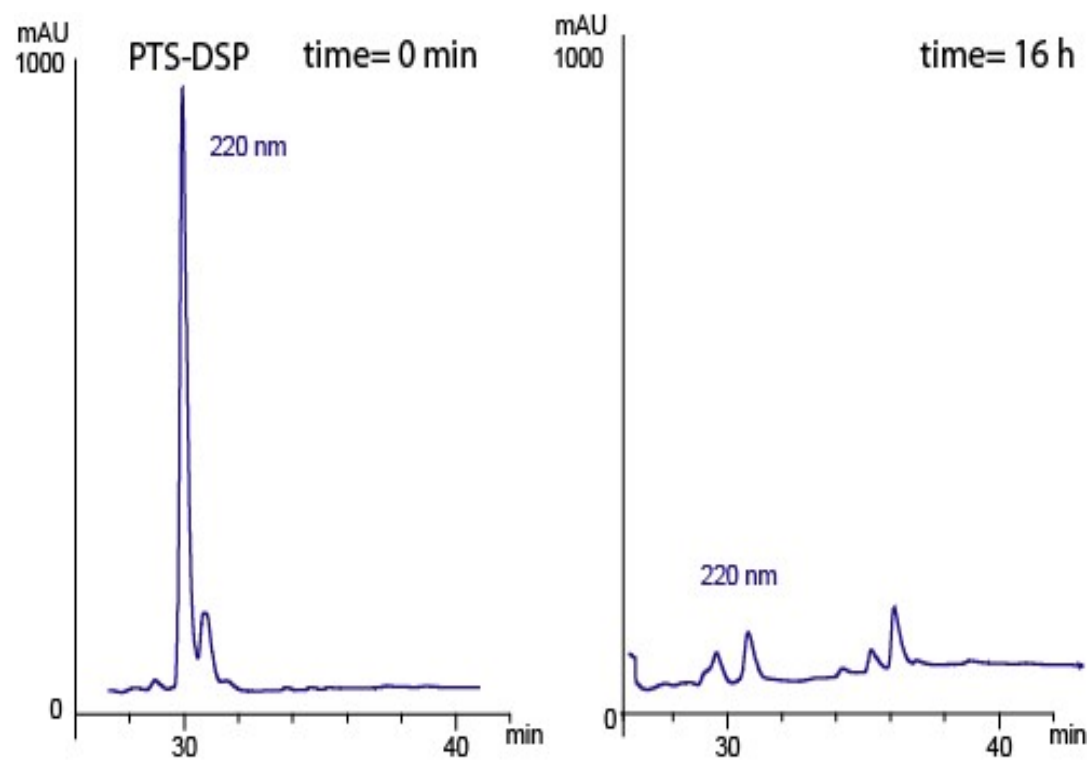

Figure S4: Lists of the PTS partners in two independent experiments along with CTR experiments.

| Accession    | Score | Mass   | Matches | Match(sig) | Sequences | Seq(sig) | emPAI | Description                                                                                        |
|--------------|-------|--------|---------|------------|-----------|----------|-------|----------------------------------------------------------------------------------------------------|
| SACS_HUMAN   | 28    | 526497 | 22      | 1          | 12        | 1        | 0.01  | Sacsin OS=Homo sapiens GN=SACS PE=1 SV=2                                                           |
| MYO15_HUMAN  | 41    | 397610 | 8       | 1          | 6         | 1        | 0.02  | Unconventional myosin-XV OS=Homo sapiens GN=MYO15A PE=1 SV=2                                       |
| RGPA2_HUMAN  | 30    | 213088 | 8       | 1          | 1         | 1        | 0.03  | Ral GTPase-activating protein subunit alpha-2 OS=Homo sapiens GN=RALGAPA2 PE=1 SV=2                |
| PHIP_HUMAN   | 22    | 208327 | 3       | 1          | 2         | 1        | 0.03  | PH-interacting protein OS=Homo sapiens GN=PHIP PE=1 SV=2                                           |
| TMX1_HUMAN   | 1532  | 32170  | 68      | 54         | 10        | 9        | 5.35  | Thioredoxin-related transmembrane protein 1 OS=Homo sapiens GN=TMX1 PE=1 SV=1                      |
| ENPL_HUMAN   | 3489  | 92696  | 96      | 71         | 10        | 3        | 0.21  | Endoplasmic reticulum protein OS=Homo sapiens GN=HSP90B1 PE=1 SV=1                                 |
| VDAC2_HUMAN  | 774   | 32060  | 35      | 30         | 7         | 6        | 2.04  | Voltage-dependent anion-selective channel protein 2 OS=Homo sapiens GN=VDAC2 PE=1 SV=2             |
| GNB1_HUMAN   | 783   | 38151  | 28      | 23         | 7         | 6        | 1.55  | Guanine nucleotide-binding protein G(I)/G(S)/G(T) subunit beta-1 OS=Homo sapiens GN=GNB1 PE=1 SV=3 |
| SFXN3_HUMAN  | 767   | 36298  | 29      | 26         | 8         | 7        | 2.15  | Sideroflexin-3 OS=Homo sapiens GN=SFXN3 PE=1 SV=2                                                  |
| OCIAD1_HUMAN | 677   | 27780  | 22      | 19         | 7         | 6        | 2.62  | OCIAD domain-containing protein 1 OS=Homo sapiens GN=OCIAD1 PE=1 SV=1                              |
| FOLR1_HUMAN  | 539   | 30712  | 20      | 18         | 6         | 5        | 1.63  | Folate receptor alpha OS=Homo sapiens GN=FOLR1 PE=1 SV=3                                           |

|                |     |       |    |    |   |   |      |                                                                                        |
|----------------|-----|-------|----|----|---|---|------|----------------------------------------------------------------------------------------|
| MLEC_HUMAN     | 696 | 32385 | 22 | 18 | 8 | 6 | 2.01 | Malectin OS=Homo sapiens GN=MLEC PE=1 SV=1                                             |
| TMX2_HUMAN     | 442 | 34358 | 21 | 16 | 6 | 5 | 1.37 | Thioredoxin-related transmembrane protein 2 OS=Homo sapiens GN=TMX2 PE=1 SV=1          |
| SCAM1_HUMAN    | 444 | 38295 | 20 | 18 | 5 | 5 | 1.54 | Secretory carrier-associated membrane protein 1 OS=Homo sapiens GN=SCAMP1 PE=1 SV=2    |
| GNB4_HUMAN     | 381 | 38284 | 29 | 19 | 5 | 4 | 0.86 | Guanine nucleotide-binding protein subunit beta-4 OS=Homo sapiens GN=GNB4 PE=1 SV=3    |
| SSR1_HUMAN     | 347 | 32215 | 12 | 12 | 1 | 1 | 0.2  | Translocon-associated protein subunit alpha OS=Homo sapiens GN=SSR1 PE=1 SV=3          |
| EMC2_HUMAN     | 321 | 34982 | 13 | 12 | 5 | 5 | 1.34 | ER membrane protein complex subunit 2 OS=Homo sapiens GN=EMC2 PE=1 SV=1                |
| EMD_HUMAN      | 321 | 29033 | 11 | 11 | 4 | 4 | 1.27 | Emerin OS=Homo sapiens GN=EMD PE=1 SV=1                                                |
| EEF1D_HUMAN    | 291 | 31217 | 14 | 11 | 6 | 5 | 1.6  | Elongation factor 1-delta OS=Homo sapiens GN=EEF1D PE=1 SV=5                           |
| SCAMP3_HUMAN   | 403 | 38661 | 9  | 8  | 3 | 3 | 0.59 | Secretory carrier-associated membrane protein 3 OS=Homo sapiens GN=SCAMP3 PE=1 SV=3    |
| BAS1_HUMAN     | 255 | 42573 | 7  | 7  | 3 | 3 | 0.52 | Basigin OS=Homo sapiens GN=BSG PE=1 SV=2                                               |
| HSD17B11_HUMAN | 208 | 33257 | 13 | 8  | 5 | 4 | 1.04 | Estradiol 17-beta-dehydrogenase 11 OS=Homo sapiens GN=HSD17B11 PE=1 SV=3               |
| COQ9_HUMAN     | 190 | 35658 | 10 | 7  | 2 | 2 | 0.65 | Ubiquinone biosynthesis protein COQ9, mitochondrial OS=Homo sapiens GN=COQ9 PE=1 SV=1  |
| VDAC3_HUMAN    | 187 | 30981 | 5  | 5  | 2 | 2 | 0.47 | Voltage-dependent anion-selective channel protein 3 OS=Homo sapiens GN=VDAC3 PE=1 SV=1 |
| SRRM1_HUMAN    | 184 | 34373 | 7  | 6  | 3 | 3 | 0.68 | Spermidine synthase OS=Homo sapiens GN=SRM PE=1 SV=1                                   |

|             |     |        |    |    |   |   |      |                                                                                              |
|-------------|-----|--------|----|----|---|---|------|----------------------------------------------------------------------------------------------|
| TUSC3_HUMAN | 228 | 39993  | 6  | 6  | 2 | 2 | 0.35 | Tumor suppressor candidate 3 OS=Homo sapiens GN=TUSC3 PE=1 SV=1                              |
| ECH1_HUMAN  | 180 | 36136  | 4  | 3  | 3 | 2 | 0.39 | Delta(3,5)-Delta(2,4)-dienoyl-CoA isomerase, mitochondrial OS=Homo sapiens GN=ECH1 PE=1 SV=2 |
| RS3A_HUMAN  | 179 | 30154  | 10 | 6  | 4 | 3 | 0.81 | 40S ribosomal protein S3a OS=Homo sapiens GN=RPS3A PE=1 SV=2                                 |
| AT1B3_HUMAN | 182 | 31834  | 6  | 5  | 3 | 2 | 0.45 | Sodium/potassium-transporting ATPase subunit beta-3 OS=Homo sapiens GN=ATP1B3 PE=1 SV=1      |
| PPP6_HUMAN  | 170 | 35806  | 4  | 4  | 2 | 2 | 0.39 | Serine/threonine-protein phosphatase 6 catalytic subunit OS=Homo sapiens GN=PPP6C PE=1 SV=1  |
| CD166_HUMAN | 264 | 65745  | 11 | 10 | 6 | 5 | 0.57 | CD166 antigen OS=Homo sapiens GN=ALCAM PE=1 SV=2                                             |
| LAMP2_HUMAN | 85  | 45503  | 4  | 3  | 1 | 1 | 0.14 | Lysosome-associated membrane glycoprotein 2 OS=Homo sapiens GN=LAMP2 PE=1 SV=2               |
| CDK1_HUMAN  | 27  | 34131  | 6  | 1  | 1 | 1 | 0.19 | Cyclin-dependent kinase 1 OS=Homo sapiens GN=CDK1 PE=1 SV=3                                  |
| ADT2_HUMAN  | 37  | 33059  | 2  | 2  | 1 | 1 | 0.2  | ADP/ATP translocase 2 OS=Homo sapiens GN=SLC25A5 PE=1 SV=7                                   |
| TAGL3_HUMAN | 24  | 22629  | 3  | 1  | 2 | 1 | 0.3  | Transgelin-3 OS=Homo sapiens GN=TAGLN3 PE=1 SV=2                                             |
| PORIM_HUMAN | 39  | 21575  | 2  | 2  | 1 | 1 | 0.32 | Porimin OS=Homo sapiens GN=TMEM123 PE=1 SV=1                                                 |
| MTOR_HUMAN  | 25  | 290759 | 10 | 1  | 5 | 1 | 0.02 | Serine/threonine-protein kinase mTOR OS=Homo sapiens GN=MTOR PE=1 SV=1                       |

|             |     |        |    |   |   |   |      |                                                                                                  |
|-------------|-----|--------|----|---|---|---|------|--------------------------------------------------------------------------------------------------|
| UACA_HUMAN  | 36  | 163545 | 13 | 3 | 7 | 1 | 0.04 | Uveal autoantigen with coiled-coil domains and ankyrin repeats OS=Homo sapiens GN=UACA PE=1 SV=2 |
| XPO7_HUMAN  | 49  | 125196 | 6  | 1 | 5 | 1 | 0.05 | Exportin-7 OS=Homo sapiens GN=XPO7 PE=1 SV=3                                                     |
| XPO1_HUMAN  | 170 | 124447 | 6  | 5 | 2 | 2 | 0.1  | Exportin-1 OS=Homo sapiens GN=XPO1 PE=1 SV=1                                                     |
| PKHA6_HUMAN | 29  | 117398 | 29 | 2 | 4 | 1 | 0.05 | Pleckstrin homology domain-containing family A member 6 OS=Homo sapiens GN=PLEKHA6 PE=1 SV=4     |
| PTPR2_HUMAN | 36  | 112000 | 17 | 1 | 4 | 1 | 0.05 | Receptor-type tyrosine-protein phosphatase N2 OS=Homo sapiens GN=PTPRN2 PE=1 SV=2                |
| XPO2_HUMAN  | 82  | 111145 | 16 | 6 | 5 | 4 | 0.24 | Exportin-2 OS=Homo sapiens GN=CSE1L PE=1 SV=3                                                    |
| TR150_HUMAN | 22  | 108658 | 12 | 1 | 3 | 1 | 0.06 | Thyroid hormone receptor-associated protein 3 OS=Homo sapiens GN=THRAP3 PE=1 SV=2                |
| ZNT7_HUMAN  | 173 | 41941  | 4  | 4 | 3 | 3 | 0.53 | Zinc transporter 7 OS=Homo sapiens GN=SLC30A7 PE=2 SV=1                                          |
| STX4_HUMAN  | 163 | 34273  | 9  | 7 | 5 | 3 | 0.68 | Syntaxin-4 OS=Homo sapiens GN=STX4 PE=1 SV=2                                                     |
| FEM1B_HUMAN | 33  | 71189  | 3  | 1 | 2 | 1 | 0.09 | Protein fem-1 homolog B OS=Homo sapiens GN=FEM1B PE=1 SV=1                                       |
| CALX_HUMAN  | 56  | 67982  | 15 | 3 | 7 | 2 | 0.19 | Calnexin OS=Homo sapiens GN=CANX PE=1 SV=2                                                       |
| BST2_HUMAN  | 139 | 20041  | 5  | 4 | 2 | 2 | 0.81 | Bone marrow stromal antigen 2 OS=Homo sapiens GN=BST2 PE=1 SV=1                                  |
| ZFP30_HUMAN | 24  | 63456  | 4  | 1 | 1 | 1 | 0.1  | Zinc finger protein 30 homolog OS=Homo sapiens GN=ZFP30 PE=2 SV=1                                |



|             |     |       |    |    |   |   |      |                                                                                            |
|-------------|-----|-------|----|----|---|---|------|--------------------------------------------------------------------------------------------|
| RMND1_HUMAN | 58  | 51970 | 2  | 2  | 1 | 1 | 0.12 | Required for meiotic nuclear division protein 1 homolog OS=Homo sapiens GN=RMND1 PE=1 SV=2 |
| MTX1_HUMAN  | 126 | 51673 | 4  | 4  | 2 | 2 | 0.26 | Metaxin-1 OS=Homo sapiens GN=MTX1 PE=1 SV=2                                                |
| TBA4A_HUMAN | 173 | 50634 | 9  | 5  | 4 | 3 | 0.42 | Tubulin alpha-4A chain OS=Homo sapiens GN=TUBA4A PE=1 SV=1                                 |
| TBB5_HUMAN  | 92  | 50095 | 6  | 3  | 4 | 3 | 0.43 | Tubulin beta chain OS=Homo sapiens GN=TUBB PE=1 SV=2                                       |
| COX15_HUMAN | 31  | 46343 | 2  | 2  | 1 | 1 | 0.14 | Cytochrome c oxidase assembly protein COX15 homolog OS=Homo sapiens GN=COX15 PE=1 SV=1     |
| DHRS1_HUMAN | 129 | 34458 | 3  | 2  | 2 | 1 | 0.19 | Dehydrogenase/reductase SDR family member 1 OS=Homo sapiens GN=DHRS1 PE=1 SV=1             |
| RS2_HUMAN   | 162 | 31590 | 13 | 10 | 5 | 3 | 0.76 | 40S ribosomal protein S2 OS=Homo sapiens GN=RPS2 PE=1 SV=2                                 |
| PGTB2_HUMAN | 151 | 37585 | 7  | 5  | 3 | 2 | 0.37 | Geranylgeranyl transferase type-2 subunit beta OS=Homo sapiens GN=RABGGTB PE=1 SV=2        |
| DEGS1_HUMAN | 148 | 38012 | 14 | 8  | 4 | 3 | 0.6  | Sphingolipid delta(4)-desaturase DES1 OS=Homo sapiens GN=DEGS1 PE=1 SV=1                   |
| PIPNB_HUMAN | 145 | 31805 | 9  | 6  | 4 | 4 | 1.11 | Phosphatidylinositol transfer protein beta isoform OS=Homo sapiens GN=PITPNB PE=1 SV=2     |
| CCHL_HUMAN  | 136 | 30981 | 7  | 7  | 3 | 3 | 0.78 | Cytochrome c-type heme lyase OS=Homo sapiens GN=HCCS PE=1 SV=1                             |
| NB5R1_HUMAN | 133 | 34244 | 8  | 8  | 3 | 3 | 0.68 | NADH-cytochrome b5 reductase 1 OS=Homo sapiens GN=CYB5R1 PE=1 SV=1                         |

|             |     |       |   |   |   |   |      |                                                                                                                 |
|-------------|-----|-------|---|---|---|---|------|-----------------------------------------------------------------------------------------------------------------|
| STX12_HUMAN | 128 | 31736 | 3 | 3 | 2 | 2 | 0.45 | Syntaxin-12 OS=Homo sapiens GN=STX12 PE=1 SV=1                                                                  |
| NDUA9_HUMAN | 124 | 42654 | 4 | 3 | 2 | 1 | 0.15 | NADH dehydrogenase [ubiquinone] 1 alpha subcomplex subunit 9, mitochondrial OS=Homo sapiens GN=NDUFA9 PE=1 SV=2 |
| STX7_HUMAN  | 116 | 29911 | 4 | 4 | 2 | 2 | 0.49 | Syntaxin-7 OS=Homo sapiens GN=STX7 PE=1 SV=4                                                                    |
| CDK4_HUMAN  | 122 | 33936 | 5 | 4 | 3 | 2 | 0.42 | Cyclin-dependent kinase 4 OS=Homo sapiens GN=CDK4 PE=1 SV=2                                                     |
| MTCH1_HUMAN | 114 | 41859 | 5 | 2 | 3 | 1 | 0.15 | Mitochondrial carrier homolog 1 OS=Homo sapiens GN=MTCH1 PE=1 SV=1                                              |
| SCAM2_HUMAN | 112 | 37082 | 2 | 2 | 1 | 1 | 0.17 | Secretory carrier-associated membrane protein 2 OS=Homo sapiens GN=SCAMP2 PE=1 SV=2                             |
| ELMD2_HUMAN | 112 | 35223 | 7 | 6 | 2 | 2 | 0.4  | ELMO domain-containing protein 2 OS=Homo sapiens GN=ELMOD2 PE=1 SV=1                                            |
| COPE_HUMAN  | 105 | 34688 | 2 | 2 | 2 | 2 | 0.41 | Coatomer subunit epsilon OS=Homo sapiens GN=COPE PE=1 SV=3                                                      |
| CD63_HUMAN  | 108 | 26474 | 5 | 4 | 2 | 1 | 0.57 | CD63 antigen OS=Homo sapiens GN=CD63 PE=1 SV=2                                                                  |
| GHC1_HUMAN  | 106 | 34904 | 5 | 3 | 3 | 2 | 0.41 | Mitochondrial glutamate carrier 1 OS=Homo sapiens GN=SLC25A22 PE=1 SV=1                                         |
| MAGT1_HUMAN | 104 | 38411 | 3 | 3 | 2 | 2 | 0.36 | Magnesium transporter protein 1 OS=Homo sapiens GN=MAGT1 PE=1 SV=1                                              |
| STX6_HUMAN  | 95  | 29215 | 2 | 2 | 1 | 1 | 0.23 | Syntaxin-6 OS=Homo sapiens GN=STX6 PE=1 SV=1                                                                    |
| SGTA_HUMAN  | 103 | 34270 | 2 | 2 | 1 | 1 | 0.19 | Small glutamine-rich tetratricopeptide repeat-containing protein alpha OS=Homo sapiens GN=SGTA PE=1 SV=1        |

|             |    |       |    |   |   |   |      |                                                                                                  |
|-------------|----|-------|----|---|---|---|------|--------------------------------------------------------------------------------------------------|
| SPG21_HUMAN | 98 | 35223 | 3  | 2 | 2 | 1 | 0.18 | Maspardin OS=Homo sapiens GN=SPG21 PE=1 SV=1                                                     |
| SYPL1_HUMAN | 95 | 28889 | 8  | 4 | 2 | 1 | 0.23 | Synaptophysin-like protein 1 OS=Homo sapiens GN=SYPL1 PE=1 SV=1                                  |
| TM55B_HUMAN | 91 | 30533 | 3  | 3 | 1 | 1 | 0.22 | Type 1 phosphatidylinositol 4,5-bisphosphate 4-phosphatase OS=Homo sapiens GN=TMEM55B PE=1 SV=1  |
| CIA30_HUMAN | 88 | 37797 | 7  | 6 | 4 | 4 | 0.88 | Complex I intermediate-associated protein 30, mitochondrial OS=Homo sapiens GN=NDUFAF1 PE=1 SV=2 |
| MCU_HUMAN   | 89 | 40127 | 2  | 2 | 1 | 1 | 0.16 | Calcium uniporter protein, mitochondrial OS=Homo sapiens GN=MCU PE=1 SV=1                        |
| TOIP1_HUMAN | 86 | 66379 | 6  | 4 | 3 | 2 | 0.2  | Torsin-1A-interacting protein 1 OS=Homo sapiens GN=TOR1AIP1 PE=1 SV=2                            |
| DHB7_HUMAN  | 86 | 38638 | 4  | 3 | 3 | 2 | 0.36 | 3-keto-steroid reductase OS=Homo sapiens GN=HSD17B7 PE=1 SV=1                                    |
| MFF_HUMAN   | 86 | 38498 | 5  | 3 | 4 | 2 | 0.36 | Mitochondrial fission factor OS=Homo sapiens GN=MFF PE=1 SV=1                                    |
| PGAM5_HUMAN | 79 | 32213 | 11 | 2 | 5 | 1 | 0.2  | Serine/threonine-protein phosphatase PGAM5, mitochondrial OS=Homo sapiens GN=PGAM5 PE=1 SV=2     |
| EPCR_HUMAN  | 73 | 26997 | 2  | 2 | 1 | 1 | 0.25 | Endothelial protein C receptor OS=Homo sapiens GN=PROCR PE=1 SV=1                                |
| MCAT_HUMAN  | 67 | 33264 | 7  | 2 | 4 | 2 | 0.43 | Mitochondrial carnitine/acylcarnitine carrier protein OS=Homo sapiens GN=SLC25A20 PE=1 SV=1      |
| P5CR1_HUMAN | 66 | 33568 | 1  | 1 | 1 | 1 | 0.19 | Pyrroline-5-carboxylate reductase 1, mitochondrial OS=Homo sapiens GN=PYCR1 PE=1 SV=2            |

|             |    |       |    |   |   |   |      |                                                                                                   |
|-------------|----|-------|----|---|---|---|------|---------------------------------------------------------------------------------------------------|
| ODPB_HUMAN  | 65 | 39550 | 4  | 3 | 3 | 2 | 0.35 | Pyruvate dehydrogenase E1 component subunit beta, mitochondrial OS=Homo sapiens GN=PDHB PE=1 SV=3 |
| RDH14_HUMAN | 60 | 37184 | 3  | 1 | 2 | 1 | 0.17 | Retinol dehydrogenase 14 OS=Homo sapiens GN=RDH14 PE=1 SV=1                                       |
| PHB_HUMAN   | 58 | 29843 | 2  | 1 | 2 | 1 | 0.22 | Prohibitin OS=Homo sapiens GN=PHB PE=1 SV=1                                                       |
| MEST_HUMAN  | 53 | 38863 | 1  | 1 | 1 | 1 | 0.17 | Mesoderm-specific transcript homolog protein OS=Homo sapiens GN=MEST PE=2 SV=2                    |
| TREX1_HUMAN | 51 | 39525 | 2  | 2 | 1 | 1 | 0.16 | Three-prime repair exonuclease 1 OS=Homo sapiens GN=TREX1 PE=1 SV=1                               |
| SDCB1_HUMAN | 50 | 32595 | 12 | 3 | 2 | 1 | 0.2  | Syntenin-1 OS=Homo sapiens GN=SDCBP PE=1 SV=1                                                     |
| ALG5_HUMAN  | 49 | 37150 | 6  | 3 | 2 | 2 | 0.38 | Dolichyl-phosphate beta-glucosyltransferase OS=Homo sapiens GN=ALG5 PE=1 SV=1                     |
| S2540_HUMAN | 47 | 38556 | 2  | 2 | 1 | 1 | 0.17 | Solute carrier family 25 member 40 OS=Homo sapiens GN=SLC25A40 PE=2 SV=1                          |
| CAPZB_HUMAN | 46 | 31616 | 6  | 1 | 2 | 1 | 0.21 | F-actin-capping protein subunit beta OS=Homo sapiens GN=CAPZB PE=1 SV=4                           |
| WDR61_HUMAN | 44 | 33731 | 3  | 2 | 2 | 1 | 0.19 | WD repeat-containing protein 61 OS=Homo sapiens GN=WDR61 PE=1 SV=1                                |
| NSA2_HUMAN  | 43 | 30218 | 6  | 3 | 1 | 1 | 0.22 | Ribosome biogenesis protein NSA2 homolog OS=Homo sapiens GN=NSA2 PE=1 SV=1                        |
| RS6_HUMAN   | 41 | 28834 | 2  | 1 | 2 | 1 | 0.23 | 40S ribosomal protein S6 OS=Homo sapiens GN=RPS6 PE=1 SV=1                                        |
| RS27A_HUMAN | 43 | 18296 | 1  | 1 | 1 | 1 | 0.38 | Ubiquitin-40S ribosomal protein S27a OS=Homo sapiens GN=RPS27A PE=1 SV=2                          |

|             |    |       |    |   |   |   |      |                                                                                                   |
|-------------|----|-------|----|---|---|---|------|---------------------------------------------------------------------------------------------------|
| CY1_HUMAN   | 36 | 35741 | 1  | 1 | 1 | 1 | 0.18 | Cytochrome c1, heme protein, mitochondrial<br>OS=Homo sapiens GN=CYC1 PE=1 SV=3                   |
| TXTP_HUMAN  | 34 | 34333 | 1  | 1 | 1 | 1 | 0.19 | Tricarboxylate transport protein, mitochondrial<br>OS=Homo sapiens GN=SLC25A1 PE=1 SV=2           |
| PGES2_HUMAN | 33 | 42088 | 1  | 1 | 1 | 1 | 0.15 | Prostaglandin E synthase 2 OS=Homo sapiens<br>GN=PTGES2 PE=1 SV=1                                 |
| STX5_HUMAN  | 33 | 39762 | 1  | 1 | 1 | 1 | 0.16 | Syntaxin-5 OS=Homo sapiens GN=STX5 PE=1<br>SV=2                                                   |
| VAPA_HUMAN  | 33 | 28103 | 2  | 1 | 2 | 1 | 0.24 | Vesicle-associated membrane protein-<br>associated protein A OS=Homo sapiens<br>GN=VAPA PE=1 SV=3 |
| LMA2L_HUMAN | 40 | 39913 | 2  | 2 | 2 | 2 | 0.35 | VIP36-like protein OS=Homo sapiens<br>GN=LMAN2L PE=1 SV=1                                         |
| P33MX_HUMAN | 32 | 33226 | 9  | 2 | 3 | 1 | 0.2  | Putative monooxygenase p33MONOX<br>OS=Homo sapiens GN=KIAA1191 PE=1 SV=1                          |
| PSDE_HUMAN  | 31 | 34726 | 2  | 2 | 1 | 1 | 0.19 | 26S proteasome non-ATPase regulatory subunit<br>14 OS=Homo sapiens GN=PSMD14 PE=1 SV=1            |
| DHB12_HUMAN | 32 | 34416 | 3  | 1 | 2 | 1 | 0.19 | Estradiol 17-beta-dehydrogenase 12 OS=Homo<br>sapiens GN=HSD17B12 PE=1 SV=2                       |
| TSYL4_HUMAN | 30 | 45440 | 10 | 1 | 3 | 1 | 0.14 | Testis-specific Y-encoded-like protein 4<br>OS=Homo sapiens GN=TSPYL4 PE=2 SV=2                   |
| GET4_HUMAN  | 30 | 36709 | 1  | 1 | 1 | 1 | 0.18 | Golgi to ER traffic protein 4 homolog OS=Homo<br>sapiens GN=GET4 PE=1 SV=1                        |
| HTAI2_HUMAN | 31 | 27260 | 1  | 1 | 1 | 1 | 0.24 | Oxidoreductase HTATIP2 OS=Homo sapiens<br>GN=HTATIP2 PE=1 SV=2                                    |
| RLA0L_HUMAN | 29 | 34514 | 3  | 1 | 2 | 1 | 0.19 | 60S acidic ribosomal protein P0-like OS=Homo<br>sapiens GN=RPLPOP6 PE=5 SV=1                      |

|             |    |       |   |   |   |   |      |                                                                                                    |
|-------------|----|-------|---|---|---|---|------|----------------------------------------------------------------------------------------------------|
| GLYAT_HUMAN | 28 | 34301 | 2 | 1 | 2 | 1 | 0.19 | Glycine N-acyltransferase OS=Homo sapiens<br>GN=GLYAT PE=1 SV=3                                    |
| TMED1_HUMAN | 27 | 25361 | 2 | 2 | 1 | 1 | 0.6  | Transmembrane emp24 domain-containing<br>protein 1 OS=Homo sapiens GN=TMED1 PE=1<br>SV=1           |
| MFSD3_HUMAN | 26 | 43011 | 1 | 1 | 1 | 1 | 0.15 | Major facilitator superfamily domain-containing<br>protein 3 OS=Homo sapiens GN=MFSD3 PE=2<br>SV=1 |
| ACTB_HUMAN  | 24 | 42052 | 1 | 1 | 1 | 1 | 0.15 | Actin, cytoplasmic 1 OS=Homo sapiens<br>GN=ACTB PE=1 SV=1                                          |
| KDSR_HUMAN  | 23 | 36563 | 1 | 1 | 1 | 1 | 0.18 | 3-ketodihydrosphingosine reductase OS=Homo<br>sapiens GN=KDSR PE=1 SV=1                            |
| HMOX2_HUMAN | 30 | 36181 | 6 | 1 | 3 | 1 | 0.18 | Heme oxygenase 2 OS=Homo sapiens<br>GN=HMOX2 PE=1 SV=2                                             |
| F177A_HUMAN | 20 | 23799 | 1 | 1 | 1 | 1 | 0.28 | Protein FAM177A1 OS=Homo sapiens<br>GN=FAM177A1 PE=1 SV=1                                          |
| PRAF3_HUMAN | 89 | 21600 | 2 | 2 | 1 | 1 | 0.32 | PRA1 family protein 3 OS=Homo sapiens<br>GN=ARL6IP5 PE=1 SV=1                                      |
| COMD8_HUMAN | 15 | 21191 | 1 | 1 | 1 | 1 | 0.32 | COMM domain-containing protein 8 OS=Homo<br>sapiens GN=COMMD8 PE=1 SV=1                            |
| TCHL1_HUMAN | 24 | 99729 | 7 | 1 | 1 | 1 | 0.06 | Trichohyalin-like protein 1 OS=Homo sapiens<br>GN=TCHHL1 PE=2 SV=1                                 |
| MPZL1_HUMAN | 20 | 29235 | 2 | 1 | 1 | 1 | 0.23 | Myelin protein zero-like protein 1 OS=Homo<br>sapiens GN=MPZL1 PE=1 SV=1                           |

Proteins identified in PTS experiment (replicate 1)

| Accession   | Score | Mass  | Matches | Match(sig) | Sequences | Seq(sig) | emPAI | Description                                                                                        |
|-------------|-------|-------|---------|------------|-----------|----------|-------|----------------------------------------------------------------------------------------------------|
| GBB1_HUMAN  | 948   | 38151 | 35      | 28         | 10        | 9        | 3.11  | Guanine nucleotide-binding protein G(I)/G(S)/G(T) subunit beta-1 OS=Homo sapiens GN=GNB1 PE=1 SV=3 |
| SFXN3_HUMAN | 783   | 36298 | 25      | 24         | 8         | 8        | 2.75  | Sideroflexin-3 OS=Homo sapiens GN=SFXN3 PE=1 SV=2                                                  |
| VDAC2_HUMAN | 737   | 32060 | 35      | 28         | 5         | 5        | 1.54  | Voltage-dependent anion-selective channel protein 2 OS=Homo sapiens GN=VDAC2 PE=1 SV=2             |
| MLEC_HUMAN  | 629   | 32385 | 18      | 18         | 7         | 7        | 2.65  | Malectin OS=Homo sapiens GN=MLEC PE=1 SV=1                                                         |
| TMX2_HUMAN  | 543   | 34358 | 23      | 19         | 9         | 7        | 2.38  | Thioredoxin-related transmembrane protein 2 OS=Homo sapiens GN=TMX2 PE=1 SV=1                      |
| SCAM3_HUMAN | 478   | 38661 | 12      | 12         | 3         | 3        | 0.59  | Secretory carrier-associated membrane protein 3 OS=Homo sapiens GN=SCAMP3 PE=1 SV=3                |
| EMC2_HUMAN  | 466   | 34982 | 14      | 14         | 6         | 6        | 1.8   | ER membrane protein complex subunit 2 OS=Homo sapiens GN=EMC2 PE=1 SV=1                            |
| PPP6_HUMAN  | 368   | 35806 | 8       | 8          | 3         | 3        | 0.65  | Serine/threonine-protein phosphatase 6 catalytic subunit OS=Homo sapiens GN=PPP6C PE=1 SV=1        |
| EMD_HUMAN   | 291   | 29033 | 9       | 9          | 4         | 4        | 1.28  | Emerin OS=Homo sapiens GN=EMD PE=1 SV=1                                                            |
| SCAM1_HUMAN | 281   | 38295 | 15      | 11         | 5         | 5        | 1.56  | Secretory carrier-associated membrane protein 1 OS=Homo sapiens GN=SCAMP1 PE=1 SV=2                |

|             |     |       |    |    |   |   |      |                                                                                              |
|-------------|-----|-------|----|----|---|---|------|----------------------------------------------------------------------------------------------|
| COPE_HUMAN  | 262 | 34688 | 5  | 5  | 3 | 3 | 0.68 | Coatomer subunit epsilon OS=Homo sapiens GN=COPE PE=1 SV=3                                   |
| DEGS1_HUMAN | 211 | 38012 | 15 | 11 | 4 | 4 | 0.88 | Sphingolipid delta(4)-desaturase DES1 OS=Homo sapiens GN=DEGS1 PE=1 SV=1                     |
| COQ9_HUMAN  | 208 | 35658 | 9  | 5  | 2 | 2 | 0.4  | Ubiquinone biosynthesis protein COQ9, mitochondrial OS=Homo sapiens GN=COQ9 PE=1 SV=1        |
| SCAM2_HUMAN | 206 | 37082 | 2  | 2  | 1 | 1 | 0.18 | Secretory carrier-associated membrane protein 2 OS=Homo sapiens GN=SCAMP2 PE=1 SV=2          |
| NB5R1_HUMAN | 194 | 34244 | 12 | 9  | 5 | 4 | 1.01 | NADH-cytochrome b5 reductase 1 OS=Homo sapiens GN=CYB5R1 PE=1 SV=1                           |
| LMA2L_HUMAN | 178 | 39913 | 8  | 6  | 4 | 2 | 0.35 | VIP36-like protein OS=Homo sapiens GN=LMAN2L PE=1 SV=1                                       |
| CCHL_HUMAN  | 162 | 30981 | 7  | 6  | 3 | 3 | 0.79 | Cytochrome c-type heme lyase OS=Homo sapiens GN=HCCS PE=1 SV=1                               |
| TUSC3_HUMAN | 156 | 39993 | 4  | 4  | 2 | 2 | 0.35 | Tumor suppressor candidate 3 OS=Homo sapiens GN=TUSC3 PE=1 SV=1                              |
| P5CR1_HUMAN | 145 | 33568 | 2  | 2  | 1 | 1 | 0.2  | Pyrroline-5-carboxylate reductase 1, mitochondrial OS=Homo sapiens GN=PYCR1 PE=1 SV=2        |
| STX7_HUMAN  | 142 | 29911 | 5  | 5  | 2 | 2 | 0.49 | Syntaxin-7 OS=Homo sapiens GN=STX7 PE=1 SV=4                                                 |
| MAGT1_HUMAN | 136 | 38411 | 7  | 4  | 4 | 2 | 0.37 | Magnesium transporter protein 1 OS=Homo sapiens GN=MAGT1 PE=1 SV=1                           |
| PGAM5_HUMAN | 136 | 32213 | 8  | 5  | 6 | 3 | 0.75 | Serine/threonine-protein phosphatase PGAM5, mitochondrial OS=Homo sapiens GN=PGAM5 PE=1 SV=2 |



|             |     |       |    |    |   |   |      |                                                                                                       |
|-------------|-----|-------|----|----|---|---|------|-------------------------------------------------------------------------------------------------------|
| DHRS1_HUMAN | 134 | 34458 | 4  | 4  | 2 | 2 | 0.42 | Dehydrogenase/reductase SDR family member 1 OS=Homo sapiens GN=DHRS1 PE=1 SV=1                        |
| GHC1_HUMAN  | 131 | 34904 | 2  | 2  | 1 | 1 | 0.19 | Mitochondrial glutamate carrier 1 OS=Homo sapiens GN=SLC25A22 PE=1 SV=1                               |
| AT1B3_HUMAN | 131 | 31834 | 5  | 3  | 3 | 1 | 0.21 | Sodium/potassium-transporting ATPase subunit beta-3 OS=Homo sapiens GN=ATP1B3 PE=1 SV=1               |
| STX12_HUMAN | 130 | 31736 | 4  | 4  | 2 | 2 | 0.46 | Syntaxin-12 OS=Homo sapiens GN=STX12 PE=1 SV=1                                                        |
| STX4_HUMAN  | 129 | 34273 | 9  | 5  | 3 | 3 | 0.69 | Syntaxin-4 OS=Homo sapiens GN=STX4 PE=1 SV=2                                                          |
| MUC18_HUMAN | 563 | 72532 | 32 | 23 | 9 | 7 | 1.1  | Cell surface glycoprotein MUC18 OS=Homo sapiens GN=MCAM PE=1 SV=2                                     |
| TKT_HUMAN   | 32  | 68519 | 2  | 1  | 1 | 1 | 0.09 | Transketolase OS=Homo sapiens GN=TKT PE=1 SV=3                                                        |
| CD166_HUMAN | 290 | 65745 | 16 | 14 | 8 | 7 | 0.89 | CD166 antigen OS=Homo sapiens GN=ALCAM PE=1 SV=2                                                      |
| LAT1_HUMAN  | 276 | 55659 | 5  | 5  | 1 | 1 | 0.11 | Large neutral amino acids transporter small subunit 1 OS=Homo sapiens GN=SLC7A5 PE=1 SV=2             |
| GTR1_HUMAN  | 24  | 54391 | 1  | 1  | 1 | 1 | 0.12 | Solute carrier family 2, facilitated glucose transporter member 1 OS=Homo sapiens GN=SLC2A1 PE=1 SV=2 |
| SCG3_HUMAN  | 36  | 52973 | 4  | 1  | 2 | 1 | 0.12 | h                                                                                                     |
| CL18A_HUMAN | 16  | 51166 | 4  | 1  | 1 | 1 | 0.12 | C-type lectin domain family 18 member A OS=Homo sapiens GN=CLEC18A PE=2 SV=3                          |

|             |     |        |    |   |   |   |      |                                                                                              |
|-------------|-----|--------|----|---|---|---|------|----------------------------------------------------------------------------------------------|
| LAMP2_HUMAN | 73  | 45503  | 2  | 2 | 1 | 1 | 0.14 | Lysosome-associated membrane glycoprotein 2 OS=Homo sapiens GN=LAMP2 PE=1 SV=2               |
| LAMP1_HUMAN | 210 | 45367  | 8  | 8 | 2 | 2 | 0.3  | Lysosome-associated membrane glycoprotein 1 OS=Homo sapiens GN=LAMP1 PE=1 SV=3               |
| F71F1_HUMAN | 30  | 39320  | 1  | 1 | 1 | 1 | 0.16 | Protein FAM71F1 OS=Homo sapiens GN=FAM71F1 PE=2 SV=1                                         |
| TCP2L_HUMAN | 26  | 38448  | 2  | 1 | 1 | 1 | 0.17 | Putative t-complex protein 10A homolog 2 OS=Homo sapiens GN=TCP10L2 PE=5 SV=2                |
| ADT3_HUMAN  | 31  | 33073  | 3  | 2 | 2 | 1 | 0.2  | ADP/ATP translocase 3 OS=Homo sapiens GN=SLC25A6 PE=1 SV=4                                   |
| PORIM_HUMAN | 34  | 21575  | 4  | 2 | 1 | 1 | 0.32 | Porimin OS=Homo sapiens GN=TMEM123 PE=1 SV=1                                                 |
| RS27A_HUMAN | 74  | 18296  | 4  | 2 | 2 | 1 | 0.38 | Ubiquitin-40S ribosomal protein S27a OS=Homo sapiens GN=RPS27A PE=1 SV=2                     |
| ANR17_HUMAN | 30  | 275970 | 7  | 1 | 5 | 1 | 0.02 | Ankyrin repeat domain-containing protein 17 OS=Homo sapiens GN=ANKRD17 PE=1 SV=3             |
| SORL_HUMAN  | 31  | 253798 | 6  | 1 | 5 | 1 | 0.02 | Sortilin-related receptor OS=Homo sapiens GN=SORL1 PE=1 SV=2                                 |
| SPG17_HUMAN | 18  | 252781 | 19 | 1 | 6 | 1 | 0.02 | Sperm-associated antigen 17 OS=Homo sapiens GN=SPAG17 PE=1 SV=1                              |
| PKHA6_HUMAN | 35  | 117398 | 23 | 2 | 3 | 1 | 0.05 | Pleckstrin homology domain-containing family A member 6 OS=Homo sapiens GN=PLEKHA6 PE=1 SV=4 |
| TCHL1_HUMAN | 24  | 99729  | 5  | 1 | 1 | 1 | 0.06 | Trichohyalin-like protein 1 OS=Homo sapiens GN=TCHHL1 PE=2 SV=1                              |

|             |      |       |    |    |   |   |      |                                                                                                                    |
|-------------|------|-------|----|----|---|---|------|--------------------------------------------------------------------------------------------------------------------|
| ENPL_HUMAN  | 2020 | 92696 | 41 | 37 | 4 | 2 | 0.14 | Endoplasmin OS=Homo sapiens<br>GN=HSP90B1 PE=1 SV=1                                                                |
| TOIP1_HUMAN | 141  | 66379 | 3  | 3  | 2 | 2 | 0.2  | Torsin-1A-interacting protein 1 OS=Homo sapiens<br>GN=TOR1AIP1 PE=1 SV=2                                           |
| PCAT2_HUMAN | 31   | 60797 | 5  | 1  | 2 | 1 | 0.1  | Lysophosphatidylcholine acyltransferase 2 OS=Homo sapiens<br>GN=LPCAT2 PE=1 SV=1                                   |
| MATN3_HUMAN | 29   | 54379 | 1  | 1  | 1 | 1 | 0.12 | Matrilin-3 OS=Homo sapiens<br>GN=MATN3 PE=1 SV=2                                                                   |
| MTX1_HUMAN  | 99   | 51673 | 4  | 4  | 2 | 2 | 0.26 | Metaxin-1 OS=Homo sapiens<br>GN=MTX1 PE=1 SV=2                                                                     |
| TBA1B_HUMAN | 110  | 50804 | 5  | 3  | 3 | 1 | 0.13 | Tubulin alpha-1B chain OS=Homo sapiens<br>GN=TUBA1B PE=1 SV=1                                                      |
| COX15_HUMAN | 35   | 46343 | 3  | 2  | 1 | 1 | 0.14 | Cytochrome c oxidase assembly protein COX15 homolog OS=Homo sapiens<br>GN=COX15 PE=1 SV=1                          |
| DHB12_HUMAN | 127  | 34416 | 8  | 6  | 4 | 3 | 0.69 | Estradiol 17-beta-dehydrogenase 12 OS=Homo sapiens<br>GN=HSD17B12 PE=1 SV=2                                        |
| STX6_HUMAN  | 127  | 29215 | 4  | 4  | 3 | 3 | 0.85 | Syntaxin-6 OS=Homo sapiens<br>GN=STX6 PE=1 SV=1                                                                    |
| ZNT7_HUMAN  | 124  | 41941 | 4  | 3  | 3 | 2 | 0.33 | Zinc transporter 7 OS=Homo sapiens<br>GN=SLC30A7 PE=2 SV=1                                                         |
| NDUA9_HUMAN | 115  | 42654 | 6  | 4  | 3 | 1 | 0.15 | NADH dehydrogenase [ubiquinone] 1 alpha subcomplex subunit 9, mitochondrial OS=Homo sapiens<br>GN=NDUFA9 PE=1 SV=2 |
| TM55B_HUMAN | 108  | 30533 | 3  | 3  | 1 | 1 | 0.22 | Type 1 phosphatidylinositol 4,5-bisphosphate 4-phosphatase OS=Homo sapiens<br>GN=TMEM55B PE=1 SV=1                 |

|             |     |       |    |   |   |   |      |                                                                                                  |
|-------------|-----|-------|----|---|---|---|------|--------------------------------------------------------------------------------------------------|
| CIA30_HUMAN | 104 | 37797 | 7  | 6 | 4 | 3 | 0.61 | Complex I intermediate-associated protein 30, mitochondrial OS=Homo sapiens GN=NDUFAF1 PE=1 SV=2 |
| BASI_HUMAN  | 93  | 42573 | 3  | 2 | 2 | 1 | 0.15 | Basigin OS=Homo sapiens GN=BSG PE=1 SV=2                                                         |
| CAPZB_HUMAN | 90  | 31616 | 6  | 3 | 2 | 1 | 0.21 | F-actin-capping protein subunit beta OS=Homo sapiens GN=CAPZB PE=1 SV=4                          |
| HAX1_HUMAN  | 88  | 31601 | 4  | 3 | 3 | 2 | 0.46 | HCLS1-associated protein X-1 OS=Homo sapiens GN=HAX1 PE=1 SV=2                                   |
| SDCB1_HUMAN | 86  | 32595 | 12 | 5 | 2 | 1 | 0.2  | Syntenin-1 OS=Homo sapiens GN=SDCBP PE=1 SV=1                                                    |
| SYPL1_HUMAN | 84  | 28889 | 14 | 4 | 2 | 1 | 0.23 | Synaptophysin-like protein 1 OS=Homo sapiens GN=SYPL1 PE=1 SV=1                                  |
| ECH1_HUMAN  | 81  | 36136 | 4  | 2 | 3 | 1 | 0.18 | Delta(3,5)-Delta(2,4)-dienoyl-CoA isomerase, mitochondrial OS=Homo sapiens GN=ECH1 PE=1 SV=2     |
| HMOX2_HUMAN | 80  | 36181 | 7  | 2 | 3 | 1 | 0.18 | Heme oxygenase 2 OS=Homo sapiens GN=HMOX2 PE=1 SV=2                                              |
| SPG21_HUMAN | 79  | 35223 | 2  | 2 | 1 | 1 | 0.19 | Maspardin OS=Homo sapiens GN=SPG21 PE=1 SV=1                                                     |
| CDK1_HUMAN  | 77  | 34131 | 9  | 3 | 3 | 2 | 0.42 | Cyclin-dependent kinase 1 OS=Homo sapiens GN=CDK1 PE=1 SV=3                                      |
| CAMLG_HUMAN | 76  | 33217 | 2  | 2 | 1 | 1 | 0.2  | Calcium signal-modulating cyclophilin ligand OS=Homo sapiens GN=CAMLG PE=1 SV=1                  |
| ELMD2_HUMAN | 71  | 35223 | 1  | 1 | 1 | 1 | 0.19 | ELMO domain-containing protein 2 OS=Homo sapiens GN=ELMOD2 PE=1 SV=1                             |

|             |    |       |   |   |   |   |      |                                                                                                            |
|-------------|----|-------|---|---|---|---|------|------------------------------------------------------------------------------------------------------------|
| TPC_HUMAN   | 69 | 35887 | 5 | 2 | 3 | 1 | 0.18 | Mitochondrial thiamine pyrophosphate carrier OS=Homo sapiens GN=SLC25A19 PE=1 SV=1                         |
| MCAT_HUMAN  | 69 | 33264 | 3 | 2 | 2 | 2 | 0.43 | Mitochondrial carnitine/acylcarnitine carrier protein OS=Homo sapiens GN=SLC25A20 PE=1 SV=1                |
| ALG5_HUMAN  | 67 | 37150 | 4 | 3 | 3 | 2 | 0.38 | Dolichyl-phosphate beta-glucosyltransferase OS=Homo sapiens GN=ALG5 PE=1 SV=1                              |
| MPZL1_HUMAN | 65 | 29235 | 5 | 3 | 3 | 2 | 0.51 | Myelin protein zero-like protein 1 OS=Homo sapiens GN=MPZL1 PE=1 SV=1                                      |
| MEST_HUMAN  | 62 | 38863 | 2 | 1 | 1 | 1 | 0.17 | Mesoderm-specific transcript homolog protein OS=Homo sapiens GN=MEST PE=2 SV=2                             |
| MTCH1_HUMAN | 61 | 41859 | 6 | 2 | 2 | 1 | 0.33 | Mitochondrial carrier homolog 1 OS=Homo sapiens GN=MTCH1 PE=1 SV=1                                         |
| PSME3_HUMAN | 56 | 29602 | 2 | 2 | 1 | 1 | 0.22 | Proteasome activator complex subunit 3 OS=Homo sapiens GN=PSME3 PE=1 SV=1                                  |
| MSMO1_HUMAN | 52 | 35592 | 2 | 2 | 1 | 1 |      | Methylsterol monooxygenase 1 OS=Homo sapiens GN=MSMO1 PE=1 SV=1                                            |
| TREX1_HUMAN | 50 | 39525 | 2 | 2 | 1 | 1 | 0.16 | Three-prime repair exonuclease 1 OS=Homo sapiens GN=TREX1 PE=1 SV=1                                        |
| PP2AB_HUMAN | 49 | 36123 | 4 | 2 | 2 | 1 | 0.18 | Serine/threonine-protein phosphatase 2A catalytic subunit beta isoform OS=Homo sapiens GN=PPP2CB PE=1 SV=1 |
| HTAI2_HUMAN | 37 | 27260 | 1 | 1 | 1 | 1 | 0.25 | Oxidoreductase HTATIP2 OS=Homo sapiens GN=HTATIP2 PE=1 SV=2                                                |
| NSA2_HUMAN  | 36 | 30218 | 5 | 2 | 1 | 1 | 0.22 | Ribosome biogenesis protein NSA2 homolog OS=Homo sapiens GN=NSA2 PE=1 SV=1                                 |

|             |    |       |   |   |   |   |      |                                                                    |
|-------------|----|-------|---|---|---|---|------|--------------------------------------------------------------------|
| EPCR_HUMAN  | 34 | 26997 | 2 | 1 | 1 | 1 | 0.25 | Endothelial protein C receptor OS=Homo sapiens GN=PROCR PE=1 SV=1  |
| CDK4_HUMAN  | 33 | 33936 | 4 | 1 | 4 | 1 | 0.19 | Cyclin-dependent kinase 4 OS=Homo sapiens GN=CDK4 PE=1 SV=2        |
| DHB7_HUMAN  | 27 | 38638 | 4 | 2 | 4 | 2 | 0.36 | 3-keto-steroid reductase OS=Homo sapiens GN=HSD17B7 PE=1 SV=1      |
| MFF_HUMAN   | 25 | 38498 | 2 | 1 | 2 | 1 | 0.17 | Mitochondrial fission factor OS=Homo sapiens GN=MFF PE=1 SV=1      |
| YIF1B_HUMAN | 23 | 34527 | 1 | 1 | 1 | 1 | 0.19 | Protein YIF1B OS=Homo sapiens GN=YIF1B PE=1 SV=1                   |
| WDR61_HUMAN | 21 | 33731 | 3 | 1 | 2 | 1 | 0.19 | WD repeat-containing protein 61 OS=Homo sapiens GN=WDR61 PE=1 SV=1 |

Proteins identified in PTS experiment (replicate 2)

| Accession   | Score | Mass  | Matches | Match(sig ) | Sequences | Seq(sig) | emPAI | Description                                                                 |
|-------------|-------|-------|---------|-------------|-----------|----------|-------|-----------------------------------------------------------------------------|
| K2C1_HUMAN  | 3344  | 66170 | 103     | 96          | 24        | 22       | 7.82  | Keratin, type II cytoskeletal 1 OS=Homo sapiens GN=KRT1 PE=1 SV=6           |
| K22E_HUMAN  | 1722  | 65678 | 68      | 58          | 18        | 16       | 4.18  | Keratin, type II cytoskeletal 2 epidermal OS=Homo sapiens GN=KRT2 PE=1 SV=2 |
| K2C5_HUMAN  | 410   | 62568 | 16      | 15          | 7         | 7        | 0.96  | Keratin, type II cytoskeletal 5 OS=Homo sapiens GN=KRT5 PE=1 SV=3           |
| K1C10_HUMAN | 2916  | 59020 | 101     | 75          | 18        | 16       | 4.08  | Keratin, type I cytoskeletal 10 OS=Homo sapiens GN=KRT10 PE=1 SV=6          |
| K1C14_HUMAN | 732   | 51872 | 27      | 22          | 9         | 8        | 1.52  | Keratin, type I cytoskeletal 14 OS=Homo sapiens GN=KRT14 PE=1 SV=4          |

|             |      |       |     |    |    |    |      |                                                                                        |
|-------------|------|-------|-----|----|----|----|------|----------------------------------------------------------------------------------------|
| K1C16_HUMAN | 543  | 51578 | 23  | 18 | 8  | 6  | 1.01 | Keratin, type I cytoskeletal 16 OS=Homo sapiens GN=KRT16 PE=1 SV=4                     |
| K1C9_HUMAN  | 1245 | 62255 | 51  | 46 | 13 | 12 | 2.5  | Keratin, type I cytoskeletal 9 OS=Homo sapiens GN=KRT9 PE=1 SV=3                       |
| OXDD_HUMAN  | 259  | 38024 | 135 | 23 | 1  | 1  | 0.17 | D-aspartate oxidase OS=Homo sapiens GN=DDO PE=2 SV=1                                   |
| ATPG_HUMAN  | 197  | 33032 | 8   | 6  | 5  | 3  | 0.72 | ATP synthase subunit gamma, mitochondrial OS=Homo sapiens GN=ATP5C1 PE=1 SV=1          |
| RDH11_HUMAN | 182  | 35763 | 11  | 5  | 5  | 2  | 0.4  | Retinol dehydrogenase 11 OS=Homo sapiens GN=RDH11 PE=1 SV=2                            |
| MPCP_HUMAN  | 123  | 40525 | 5   | 5  | 2  | 2  | 0.34 | Phosphate carrier protein, mitochondrial OS=Homo sapiens GN=SLC25A3 PE=1 SV=2          |
| VDAC1_HUMAN | 106  | 30868 | 6   | 4  | 3  | 2  | 0.47 | Voltage-dependent anion-selective channel protein 1 OS=Homo sapiens GN=VDAC1 PE=1 SV=2 |
| LMAN2_HUMAN | 102  | 40545 | 8   | 4  | 5  | 2  | 0.34 | Vesicular integral-membrane protein VIP36 OS=Homo sapiens GN=LMAN2 PE=1 SV=1           |
| RS3_HUMAN   | 101  | 26842 | 5   | 3  | 3  | 2  | 0.56 | 40S ribosomal protein S3 OS=Homo sapiens GN=RPS3 PE=1 SV=2                             |
| ADT2_HUMAN  | 96   | 33059 | 5   | 5  | 3  | 3  | 0.72 | ADP/ATP translocase 2 OS=Homo sapiens GN=SLC25A5 PE=1 SV=7                             |
| LRC59_HUMAN | 91   | 35308 | 4   | 4  | 3  | 3  | 0.66 | Leucine-rich repeat-containing protein 59 OS=Homo sapiens GN=LRR59 PE=1 SV=1           |
| PHB2_HUMAN  | 88   | 33276 | 7   | 3  | 5  | 2  | 0.43 | Prohibitin-2 OS=Homo sapiens GN=PHB2 PE=1 SV=2                                         |
| NB5R3_HUMAN | 82   | 34441 | 6   | 3  | 4  | 2  | 0.42 | NADH-cytochrome b5 reductase 3 OS=Homo sapiens GN=CYB5R3 PE=1 SV=3                     |

|             |    |        |    |   |   |   |      |                                                                                                    |
|-------------|----|--------|----|---|---|---|------|----------------------------------------------------------------------------------------------------|
| GBLP_HUMAN  | 70 | 35511  | 6  | 4 | 2 | 2 | 0.4  | Guanine nucleotide-binding protein subunit beta-2-like 1 OS=Homo sapiens GN=GNB2L1 PE=1 SV=3       |
| IPO5_HUMAN  | 69 | 125032 | 2  | 2 | 1 | 1 | 0.05 | Importin-5 OS=Homo sapiens GN=IPO5 PE=1 SV=4                                                       |
| DCD_HUMAN   | 65 | 11391  | 2  | 2 | 1 | 1 | 0.68 | Dermcidin OS=Homo sapiens GN=DCD PE=1 SV=2                                                         |
| SFXN1_HUMAN | 54 | 35881  | 5  | 2 | 4 | 2 | 0.4  | Sideroflexin-1 OS=Homo sapiens GN=SFXN1 PE=1 SV=4                                                  |
| PPT1_HUMAN  | 53 | 34627  | 1  | 1 | 1 | 1 | 0.19 | Palmitoyl-protein thioesterase 1 OS=Homo sapiens GN=PPT1 PE=1 SV=1                                 |
| DIRA2_HUMAN | 43 | 22813  | 1  | 1 | 1 | 1 | 0.3  | GTP-binding protein Di-Ras2 OS=Homo sapiens GN=DIRAS2 PE=1 SV=1                                    |
| BACH2_HUMAN | 38 | 94644  | 21 | 5 | 1 | 1 | 0.07 | Transcription regulator protein BACH2 OS=Homo sapiens GN=BACH2 PE=1 SV=1                           |
| SNAA_HUMAN  | 38 | 33667  | 1  | 1 | 1 | 1 | 0.19 | Alpha-soluble NSF attachment protein OS=Homo sapiens GN=NAPA PE=1 SV=3                             |
| ZN326_HUMAN | 38 | 65955  | 8  | 1 | 1 | 1 | 0.1  | DBIRD complex subunit ZNF326 OS=Homo sapiens GN=ZNF326 PE=1 SV=2                                   |
| GBB2_HUMAN  | 38 | 38048  | 5  | 2 | 2 | 2 | 0.37 | Guanine nucleotide-binding protein G(I)/G(S)/G(T) subunit beta-2 OS=Homo sapiens GN=GNB2 PE=1 SV=3 |
| KDM4C_HUMAN | 37 | 121958 | 3  | 1 | 2 | 1 | 0.05 | Lysine-specific demethylase 4C OS=Homo sapiens GN=KDM4C PE=1 SV=2                                  |
| SCLT1_HUMAN | 36 | 81203  | 17 | 3 | 3 | 1 | 0.08 | Sodium channel and clathrin linker 1 OS=Homo sapiens GN=SCLT1 PE=1 SV=2                            |



|             |    |        |    |   |   |   |      |                                                                                                    |
|-------------|----|--------|----|---|---|---|------|----------------------------------------------------------------------------------------------------|
| ERGI1_HUMAN | 34 | 32971  | 3  | 1 | 1 | 1 | 0.2  | Endoplasmic reticulum-Golgi intermediate compartment protein 1 OS=Homo sapiens GN=ERGIC1 PE=1 SV=1 |
| PAR6B_HUMAN | 33 | 41214  | 5  | 2 | 2 | 1 | 0.16 | Partitioning defective 6 homolog beta OS=Homo sapiens GN=PAR6B PE=1 SV=1                           |
| KIF4A_HUMAN | 32 | 141390 | 20 | 4 | 3 | 1 | 0.04 | Chromosome-associated kinesin KIF4A OS=Homo sapiens GN=KIF4A PE=1 SV=3                             |
| MTCH2_HUMAN | 31 | 33936  | 4  | 1 | 2 | 1 | 0.19 | Mitochondrial carrier homolog 2 OS=Homo sapiens GN=MTCH2 PE=1 SV=1                                 |
| HEAT6_HUMAN | 31 | 130410 | 9  | 4 | 3 | 1 | 0.05 | HEAT repeat-containing protein 6 OS=Homo sapiens GN=HEATR6 PE=1 SV=1                               |
| KAP1_HUMAN  | 30 | 43388  | 19 | 1 | 2 | 1 | 0.15 | cAMP-dependent protein kinase type I-beta regulatory subunit OS=Homo sapiens GN=PRKAR1B PE=1 SV=4  |
| RGPA2_HUMAN | 29 | 213088 | 16 | 2 | 2 | 1 | 0.03 | Ral GTPase-activating protein subunit alpha-2 OS=Homo sapiens GN=RALGAPA2 PE=1 SV=2                |
| PCAT2_HUMAN | 29 | 60797  | 8  | 1 | 3 | 1 | 0.1  | Lysophosphatidylcholine acyltransferase 2 OS=Homo sapiens GN=LPCAT2 PE=1 SV=1                      |
| HPSE_HUMAN  | 28 | 61395  | 3  | 1 | 2 | 1 | 0.1  | Heparanase OS=Homo sapiens GN=HPSE PE=1 SV=2                                                       |
| HOOK2_HUMAN | 28 | 83726  | 13 | 1 | 1 | 1 | 0.07 | Protein Hook homolog 2 OS=Homo sapiens GN=HOOK2 PE=1 SV=3                                          |
| USH1C_HUMAN | 27 | 62400  | 2  | 1 | 1 | 1 | 0.1  | Harmonin OS=Homo sapiens GN=USH1C PE=1 SV=3                                                        |
| CDK1_HUMAN  | 26 | 34131  | 15 | 1 | 1 | 1 | 0.19 | Cyclin-dependent kinase 1 OS=Homo sapiens GN=CDK1 PE=1 SV=3                                        |

|             |    |        |     |   |   |   |      |                                                                                                                |
|-------------|----|--------|-----|---|---|---|------|----------------------------------------------------------------------------------------------------------------|
| S35E1_HUMAN | 26 | 45086  | 2   | 1 | 1 | 1 | 0.14 | Solute carrier family 35 member E1<br>OS=Homo sapiens GN=SLC35E1 PE=1 SV=2                                     |
| PKDRE_HUMAN | 25 | 257908 | 148 | 1 | 1 | 1 | 0.02 | Polycystic kidney disease and receptor for<br>egg jelly-related protein OS=Homo sapiens<br>GN=PKDREJ PE=2 SV=2 |
| TRI14_HUMAN | 25 | 50597  | 3   | 1 | 2 | 1 | 0.13 | Tripartite motif-containing protein 14<br>OS=Homo sapiens GN=TRIM14 PE=2 SV=2                                  |
| NOL12_HUMAN | 24 | 24648  | 20  | 1 | 1 | 1 | 0.27 | Nucleolar protein 12 OS=Homo sapiens<br>GN=NOL12 PE=1 SV=1                                                     |
| LUZP2_HUMAN | 23 | 39275  | 2   | 1 | 2 | 1 | 0.16 | Leucine zipper protein 2 OS=Homo sapiens<br>GN=LUZP2 PE=2 SV=2                                                 |
| THADA_HUMAN | 21 | 222886 | 8   | 1 | 2 | 1 | 0.03 | Thyroid adenoma-associated protein<br>OS=Homo sapiens GN=THADA PE=1 SV=1                                       |
| URFB1_HUMAN | 20 | 160582 | 5   | 1 | 2 | 1 | 0.04 | UHRF1-binding protein 1 OS=Homo sapiens<br>GN=UHRF1BP1 PE=1 SV=1                                               |
| VP26A_HUMAN | 17 | 38260  | 1   | 1 | 1 | 1 | 0.17 | Vacuolar protein sorting-associated protein<br>26A OS=Homo sapiens GN=VPS26A PE=1<br>SV=2                      |

#### Proteins identified in CTR experiment (replicate 1)

| Accession  | Score | Mass  | Matches | Match(sig) | Sequences | Seq(sig) | emPAI | Description                                                                    |
|------------|-------|-------|---------|------------|-----------|----------|-------|--------------------------------------------------------------------------------|
| K2C1_HUMAN | 3254  | 66170 | 86      | 80         | 22        | 21       | 6.36  | Keratin, type II cytoskeletal 1 OS=Homo<br>sapiens GN=KRT1 PE=1 SV=6           |
| K22E_HUMAN | 1012  | 65678 | 38      | 31         | 15        | 12       | 2.28  | Keratin, type II cytoskeletal 2 epidermal<br>OS=Homo sapiens GN=KRT2 PE=1 SV=2 |

|             |      |       |    |    |    |    |      |                                                                                              |
|-------------|------|-------|----|----|----|----|------|----------------------------------------------------------------------------------------------|
| K2C5_HUMAN  | 362  | 62568 | 16 | 16 | 9  | 9  | 1.37 | Keratin, type II cytoskeletal 5 OS=Homo sapiens GN=KRT5 PE=1 SV=3                            |
| K2C6C_HUMAN | 304  | 60273 | 13 | 12 | 7  | 6  | 0.82 | Keratin, type II cytoskeletal 6C OS=Homo sapiens GN=KRT6C PE=1 SV=3                          |
| K2C73_HUMAN | 93   | 59457 | 6  | 5  | 3  | 2  | 0.22 | Keratin, type II cytoskeletal 73 OS=Homo sapiens GN=KRT73 PE=1 SV=1                          |
| K1C10_HUMAN | 1875 | 59020 | 50 | 40 | 16 | 10 | 1.76 | Keratin, type I cytoskeletal 10 OS=Homo sapiens GN=KRT10 PE=1 SV=6                           |
| K1C14_HUMAN | 300  | 51872 | 18 | 10 | 8  | 5  | 0.78 | Keratin, type I cytoskeletal 14 OS=Homo sapiens GN=KRT14 PE=1 SV=4                           |
| K1C9_HUMAN  | 637  | 62255 | 35 | 27 | 11 | 10 | 1.89 | Keratin, type I cytoskeletal 9 OS=Homo sapiens GN=KRT9 PE=1 SV=3                             |
| LMAN2_HUMAN | 418  | 40545 | 24 | 15 | 7  | 5  | 1.1  | Vesicular integral-membrane protein VIP36 OS=Homo sapiens GN=LMAN2 PE=1 SV=1                 |
| GBLP_HUMAN  | 409  | 35511 | 16 | 15 | 7  | 7  | 2.26 | Guanine nucleotide-binding protein subunit beta-2-like 1 OS=Homo sapiens GN=GNB2L1 PE=1 SV=3 |
| ATPG_HUMAN  | 379  | 33032 | 14 | 14 | 4  | 4  | 1.06 | ATP synthase subunit gamma, mitochondrial OS=Homo sapiens GN=ATP5C1 PE=1 SV=1                |
| NB5R3_HUMAN | 374  | 34441 | 21 | 15 | 8  | 6  | 1.84 | NADH-cytochrome b5 reductase 3 OS=Homo sapiens GN=CYB5R3 PE=1 SV=3                           |
| PHB2_HUMAN  | 282  | 33276 | 12 | 11 | 6  | 5  | 1.46 | Prohibitin-2 OS=Homo sapiens GN=PHB2 PE=1 SV=2                                               |
| VDAC1_HUMAN | 250  | 30868 | 13 | 9  | 5  | 4  | 1.17 | Voltage-dependent anion-selective channel protein 1 OS=Homo sapiens GN=VDAC1 PE=1 SV=2       |

|             |     |       |    |    |   |   |      |                                                                                                    |
|-------------|-----|-------|----|----|---|---|------|----------------------------------------------------------------------------------------------------|
| EF1D_HUMAN  | 229 | 31217 | 13 | 10 | 5 | 4 | 1.16 | Elongation factor 1-delta OS=Homo sapiens GN=EEF1D PE=1 SV=5                                       |
| SFXN1_HUMAN | 211 | 35881 | 10 | 5  | 5 | 3 | 0.65 | Sideroflexin-1 OS=Homo sapiens GN=SFXN1 PE=1 SV=4                                                  |
| MTCH2_HUMAN | 188 | 33936 | 12 | 8  | 3 | 3 | 0.7  | Mitochondrial carrier homolog 2 OS=Homo sapiens GN=MTCH2 PE=1 SV=1                                 |
| GBB2_HUMAN  | 180 | 38048 | 12 | 8  | 3 | 3 | 0.6  | Guanine nucleotide-binding protein G(I)/G(S)/G(T) subunit beta-2 OS=Homo sapiens GN=GNB2 PE=1 SV=3 |
| OXDD_HUMAN  | 148 | 38024 | 81 | 12 | 1 | 1 | 0.17 | D-aspartate oxidase OS=Homo sapiens GN=DDO PE=2 SV=1                                               |
| PPT1_HUMAN  | 142 | 34627 | 6  | 5  | 2 | 2 | 0.41 | Palmitoyl-protein thioesterase 1 OS=Homo sapiens GN=PPT1 PE=1 SV=1                                 |
| LRC59_HUMAN | 130 | 35308 | 9  | 7  | 4 | 3 | 0.66 | Leucine-rich repeat-containing protein 59 OS=Homo sapiens GN=LRR59 PE=1 SV=1                       |
| RDH11_HUMAN | 121 | 35763 | 8  | 2  | 3 | 1 | 0.18 | Retinol dehydrogenase 11 OS=Homo sapiens GN=RDH11 PE=1 SV=2                                        |
| OCAD1_HUMAN | 105 | 27780 | 2  | 2  | 1 | 1 | 0.24 | OCIA domain-containing protein 1 OS=Homo sapiens GN=OCIAD1 PE=1 SV=1                               |
| TMX1_HUMAN  | 98  | 32170 | 9  | 5  | 4 | 3 | 0.75 | Thioredoxin-related transmembrane protein 1 OS=Homo sapiens GN=TMX1 PE=1 SV=1                      |
| ERGI1_HUMAN | 77  | 32971 | 7  | 7  | 3 | 3 | 0.72 | Endoplasmic reticulum-Golgi intermediate compartment protein 1 OS=Homo sapiens GN=ERGIC1 PE=1 SV=1 |
| RS3_HUMAN   | 70  | 26842 | 3  | 2  | 2 | 1 | 0.25 | 40S ribosomal protein S3 OS=Homo sapiens GN=RPS3 PE=1 SV=2                                         |

|             |    |       |   |   |   |   |      |                                                                                                                   |
|-------------|----|-------|---|---|---|---|------|-------------------------------------------------------------------------------------------------------------------|
| SPEE_HUMAN  | 68 | 34373 | 5 | 4 | 3 | 2 | 0.42 | Spermidine synthase OS=Homo sapiens<br>GN=SRM PE=1 SV=1                                                           |
| SNAA_HUMAN  | 68 | 33667 | 4 | 3 | 3 | 2 | 0.43 | Alpha-soluble NSF attachment protein<br>OS=Homo sapiens GN=NAPA PE=1 SV=3                                         |
| SGTA_HUMAN  | 67 | 34270 | 2 | 2 | 1 | 1 | 0.19 | Small glutamine-rich tetratricopeptide<br>repeat-containing protein alpha OS=Homo<br>sapiens GN=SGTA PE=1 SV=1    |
| CD63_HUMAN  | 66 | 26474 | 2 | 2 | 1 | 1 | 0.25 | CD63 antigen OS=Homo sapiens GN=CD63<br>PE=1 SV=2                                                                 |
| PP2AA_HUMAN | 66 | 36142 | 3 | 1 | 3 | 1 | 0.18 | Serine/threonine-protein phosphatase 2A<br>catalytic subunit alpha isoform OS=Homo<br>sapiens GN=PPP2CA PE=1 SV=1 |
| RS2_HUMAN   | 65 | 31590 | 4 | 4 | 2 | 2 | 0.46 | 40S ribosomal protein S2 OS=Homo sapiens<br>GN=RPS2 PE=1 SV=2                                                     |
| EF1A1_HUMAN | 64 | 50451 | 4 | 1 | 2 | 1 | 0.13 | Elongation factor 1-alpha 1 OS=Homo<br>sapiens GN=EEF1A1 PE=1 SV=1                                                |
| LDHA_HUMAN  | 63 | 36950 | 4 | 3 | 3 | 2 | 0.38 | L-lactate dehydrogenase A chain OS=Homo<br>sapiens GN=LDHA PE=1 SV=2                                              |
| NAIF1_HUMAN | 58 | 35370 | 8 | 8 | 1 | 1 | 0.18 | Nuclear apoptosis-inducing factor 1<br>OS=Homo sapiens GN=NAIF1 PE=1 SV=1                                         |
| SSRA_HUMAN  | 57 | 32215 | 1 | 1 | 1 | 1 | 0.2  | Translocon-associated protein subunit<br>alpha OS=Homo sapiens GN=SSR1 PE=1<br>SV=3                               |
| DCD_HUMAN   | 57 | 11391 | 3 | 2 | 2 | 1 | 0.68 | Dermcidin OS=Homo sapiens GN=DCD PE=1<br>SV=2                                                                     |
| KT3K_HUMAN  | 52 | 34618 | 2 | 2 | 1 | 1 | 0.19 | Ketosamine-3-kinase OS=Homo sapiens<br>GN=FN3KRP PE=1 SV=2                                                        |

|              |    |        |    |   |   |   |      |                                                                                                  |
|--------------|----|--------|----|---|---|---|------|--------------------------------------------------------------------------------------------------|
| KIF4B_HUMAN  | 51 | 141829 | 25 | 9 | 4 | 1 | 0.04 | Chromosome-associated kinesin KIF4B OS=Homo sapiens GN=KIF4B PE=2 SV=2                           |
| ADT2_HUMAN   | 50 | 33059  | 4  | 2 | 2 | 1 | 0.2  | ADP/ATP translocase 2 OS=Homo sapiens GN=SLC25A5 PE=1 SV=7                                       |
| OTUB1_HUMAN  | 49 | 31492  | 2  | 1 | 1 | 1 | 0.21 | Ubiquitin thioesterase OTUB1 OS=Homo sapiens GN=OTUB1 PE=1 SV=2                                  |
| PIPNB_HUMAN  | 48 | 31805  | 4  | 2 | 3 | 2 | 0.46 | Phosphatidylinositol transfer protein beta isoform OS=Homo sapiens GN=PITPNB PE=1 SV=2           |
| IPYR2_HUMAN  | 47 | 38409  | 2  | 1 | 2 | 1 | 0.17 | Inorganic pyrophosphatase 2, mitochondrial OS=Homo sapiens GN=PPA2 PE=1 SV=2                     |
| DIRA2_HUMAN  | 47 | 22813  | 2  | 2 | 1 | 1 | 0.3  | GTP-binding protein Di-Ras2 OS=Homo sapiens GN=DIRAS2 PE=1 SV=1                                  |
| ANXA2_HUMAN  | 46 | 38808  | 4  | 1 | 3 | 1 | 0.17 | Annexin A2 OS=Homo sapiens GN=ANXA2 PE=1 SV=2                                                    |
| ZNF608_HUMAN | 44 | 163135 | 3  | 1 | 2 | 1 | 0.04 | Zinc finger protein 608 OS=Homo sapiens GN=ZNF608 PE=1 SV=4                                      |
| RS3A_HUMAN   | 44 | 30154  | 3  | 2 | 2 | 1 | 0.22 | 40S ribosomal protein S3a OS=Homo sapiens GN=RPS3A PE=1 SV=2                                     |
| MPCP_HUMAN   | 42 | 40525  | 3  | 3 | 1 | 1 | 0.16 | Phosphate carrier protein, mitochondrial OS=Homo sapiens GN=SLC25A3 PE=1 SV=2                    |
| UACA_HUMAN   | 41 | 163545 | 25 | 6 | 4 | 1 | 0.04 | Uveal autoantigen with coiled-coil domains and ankyrin repeats OS=Homo sapiens GN=UACA PE=1 SV=2 |
| PGTB2_HUMAN  | 39 | 37585  | 3  | 2 | 2 | 1 | 0.17 | Geranylgeranyl transferase type-2 subunit beta OS=Homo sapiens GN=RABGGTB PE=1 SV=2              |

|             |    |        |    |   |   |   |      |                                                                                            |
|-------------|----|--------|----|---|---|---|------|--------------------------------------------------------------------------------------------|
| RMP_HUMAN   | 39 | 60252  | 11 | 2 | 2 | 1 | 0.1  | Unconventional prefoldin RPB5 interactor 1<br>OS=Homo sapiens GN=URI1 PE=1 SV=3            |
| DHB11_HUMAN | 38 | 33257  | 5  | 1 | 2 | 1 | 0.2  | Estradiol 17-beta-dehydrogenase 11<br>OS=Homo sapiens GN=HSD17B11 PE=1<br>SV=3             |
| ELAV1_HUMAN | 37 | 36240  | 1  | 1 | 1 | 1 | 0.18 | ELAV-like protein 1 OS=Homo sapiens<br>GN=ELAVL1 PE=1 SV=2                                 |
| RLA0_HUMAN  | 36 | 34423  | 2  | 1 | 2 | 1 | 0.19 | 60S acidic ribosomal protein P0 OS=Homo<br>sapiens GN=RPLP0 PE=1 SV=1                      |
| DECR_HUMAN  | 35 | 36330  | 2  | 1 | 2 | 1 | 0.18 | 2,4-dienoyl-CoA reductase, mitochondrial<br>OS=Homo sapiens GN=DECR1 PE=1 SV=1             |
| BACH2_HUMAN | 34 | 94644  | 21 | 2 | 3 | 1 | 0.07 | Transcription regulator protein BACH2<br>OS=Homo sapiens GN=BACH2 PE=1 SV=1                |
| MY18A_HUMAN | 34 | 234168 | 16 | 1 | 3 | 1 | 0.03 | Unconventional myosin-XVIIIa OS=Homo<br>sapiens GN=MYO18A PE=1 SV=3                        |
| HYDIN_HUMAN | 33 | 580945 | 16 | 2 | 2 | 1 | 0.01 | Hydrocephalus-inducing protein homolog<br>OS=Homo sapiens GN=HYDIN PE=1 SV=3               |
| PAR6B_HUMAN | 33 | 41214  | 3  | 2 | 2 | 1 | 0.16 | Partitioning defective 6 homolog beta<br>OS=Homo sapiens GN=PAR6B PE=1 SV=1                |
| RGPA2_HUMAN | 32 | 213088 | 16 | 3 | 4 | 1 | 0.03 | Ral GTPase-activating protein subunit alpha-<br>2 OS=Homo sapiens GN=RALGAPA2 PE=1<br>SV=2 |
| PDXK_HUMAN  | 32 | 35308  | 1  | 1 | 1 | 1 | 0.19 | Pyridoxal kinase OS=Homo sapiens<br>GN=PDXK PE=1 SV=1                                      |
| CNNM1_HUMAN | 32 | 105426 | 4  | 1 | 3 | 1 | 0.06 | Metal transporter CNNM1 OS=Homo<br>sapiens GN=CNNM1 PE=2 SV=3                              |
| SCLT1_HUMAN | 31 | 81203  | 10 | 2 | 2 | 1 | 0.08 | Sodium channel and clathrin linker 1<br>OS=Homo sapiens GN=SCLT1 PE=1 SV=2                 |

|             |    |        |    |   |   |   |      |                                                                                       |
|-------------|----|--------|----|---|---|---|------|---------------------------------------------------------------------------------------|
| LC1L1_HUMAN | 30 | 18078  | 1  | 1 | 1 | 1 | 0.39 | Putative lipocalin 1-like protein 1 OS=Homo sapiens GN=LCN1P1 PE=5 SV=1               |
| QRIC2_HUMAN | 29 | 181228 | 15 | 1 | 4 | 1 | 0.03 | Glutamine-rich protein 2 OS=Homo sapiens GN=QRICH2 PE=1 SV=1                          |
| CAD24_HUMAN | 28 | 88154  | 1  | 1 | 1 | 1 | 0.07 | Cadherin-24 OS=Homo sapiens GN=CDH24 PE=1 SV=1                                        |
| HEAT6_HUMAN | 27 | 130410 | 8  | 3 | 2 | 1 | 0.05 | HEAT repeat-containing protein 6 OS=Homo sapiens GN=HEATR6 PE=1 SV=1                  |
| SREC2_HUMAN | 25 | 96980  | 4  | 1 | 2 | 1 | 0.06 | Scavenger receptor class F member 2 OS=Homo sapiens GN=SCARF2 PE=1 SV=4               |
| PSDE_HUMAN  | 25 | 34726  | 3  | 2 | 2 | 2 | 0.41 | 26S proteasome non-ATPase regulatory subunit 14 OS=Homo sapiens GN=PSMD14 PE=1 SV=1   |
| FPGT_HUMAN  | 24 | 67525  | 5  | 1 | 3 | 1 | 0.09 | Fucose-1-phosphate guanylyltransferase OS=Homo sapiens GN=FPGT PE=1 SV=2              |
| FOLR1_HUMAN | 23 | 30712  | 1  | 1 | 1 | 1 | 0.22 | Folate receptor alpha OS=Homo sapiens GN=FOLR1 PE=1 SV=3                              |
| CRBG3_HUMAN | 19 | 117378 | 6  | 1 | 4 | 1 | 0.05 | Beta/gamma crystallin domain-containing protein 3 OS=Homo sapiens GN=CRYBG3 PE=2 SV=2 |
| MK07_HUMAN  | 17 | 88787  | 4  | 1 | 2 | 1 | 0.07 | Mitogen-activated protein kinase 7 OS=Homo sapiens GN=MAPK7 PE=1 SV=2                 |
| RMXL3_HUMAN | 16 | 115724 | 4  | 2 | 2 | 1 | 0.05 | RNA-binding motif protein, X-linked-like-3 OS=Homo sapiens GN=RBMXL3 PE=2 SV=2        |

Proteins identified in CTR experiment (replicate 2)



Note: For each protein the following parameters are reported: Mascot score (Score), molecular weight (mass), number of matched peptides (Matches) and unique peptides used in the identification process (Match(sig)), number of sequences (Sequences) and the number of significant distinct sequence matches in the protein identification process (Seq(sig)) and the relative quantitation of each protein (emPAI).

Figure S5: Mascot Search results for syntaxins identification

**MATRIX SCIENCE MASCOT Search Results**

**Protein View: STX4\_HUMAN**

Syntaxin-4 OS=Homo sapiens GN=STX4 PE=1 SV=2

Database: SwissProt  
 Score: 135  
 Nominal mass (M<sub>r</sub>): 34273  
 Calculated pI: 5.92  
 Taxonomy: [Homo sapiens](#)

Sequence similarity is available as [an NCBI BLAST search of STX4\\_HUMAN against nr.](#)

**Search parameters**

MS data file: 20160628\_cc\_ptero\_1plh\_2.mgf  
 Enzyme: Trypsin: cuts C-term side of KR unless next residue is P.  
 Fixed modifications: [Carbamidomethyl \(C\)](#)  
 Variable modifications: [Phospho \(ST\)](#), [Oxidation \(M\)](#)

**Protein sequence coverage: 13%**

Matched peptides shown in **bold red**.

```

1 MRDRTHELRQ GDDSSDEEDK ERVALVVHFG TARLGGSPDEE FFHKVRTIRQ
51 IIVKLGKRVQ ELEKQQVTIL ATPLPEESMK QELQNLRDEI KQLGREIRLQ
101 LKAIEPQKEE ADENYNSVNT RMAKIQHGVL SQQFVELINK CNSMQSEYRE
151 KNVERIRRQL KITNAGMVSQ EELEQMLDSG QSEVEVSNIL KDTQVTRQAL
201 NEISARKSEI QQLEKSIREL HDIFFIFLATE VEMQGEINR IEKNILSSAD
251 YVERGQEHVK TALENQKRR KKKVLIAICV SITVVLLAVI IGVTVVVG
    
```

Unformatted sequence string: [297 residues](#) (for pasting into other applications).

Sort peptides by  Residue Number  Increasing Mass  Decreasing Mass

Show predicted peptides also

| Query                | Start - End | Observed  | Mr(expt)  | Mr(calc)  | ppm   | M | Score | Expect   | Rank | U | Peptide                                         |
|----------------------|-------------|-----------|-----------|-----------|-------|---|-------|----------|------|---|-------------------------------------------------|
| <a href="#">1021</a> | 34 - 44     | 653.3088  | 1304.6030 | 1304.6037 | -0.55 | 0 | 41    | 0.0012   | 1    | U | R.LGSPDEEFFHK.V                                 |
| <a href="#">2587</a> | 103 - 121   | 763.0027  | 2285.9862 | 2285.9801 | 2.69  | 1 | 33    | 0.016    | 1    | U | <b>K.AIEPQKEEADEN</b> YNSVNT.R.M + Phospho (ST) |
| <a href="#">2588</a> | 103 - 121   | 763.0027  | 2285.9862 | 2285.9801 | 2.69  | 1 | 22    | 0.11     | 1    | U | <b>K.AIEPQKEEADEN</b> YNSVNT.R.M + Phospho (ST) |
| <a href="#">2589</a> | 103 - 121   | 763.0027  | 2285.9862 | 2285.9801 | 2.69  | 1 | 31    | 0.0089   | 1    | U | <b>K.AIEPQKEEADEN</b> YNSVNT.R.M + Phospho (ST) |
| <a href="#">2590</a> | 103 - 121   | 1144.0009 | 2285.9872 | 2285.9801 | 3.09  | 1 | 18    | 0.09     | 1    | U | <b>K.AIEPQKEEADEN</b> YNSVNT.R.M + Phospho (ST) |
| <a href="#">2591</a> | 103 - 121   | 1144.0009 | 2285.9872 | 2285.9801 | 3.09  | 1 | 9     | 0.62     | 1    | U | <b>K.AIEPQKEEADEN</b> YNSVNT.R.M + Phospho (ST) |
| <a href="#">2592</a> | 103 - 121   | 1144.0017 | 2285.9889 | 2285.9801 | 3.84  | 1 | 23    | 0.095    | 1    | U | <b>K.AIEPQKEEADEN</b> YNSVNT.R.M + Phospho (ST) |
| <a href="#">252</a>  | 244 - 254   | 633.8203  | 1265.6261 | 1265.6252 | 0.73  | 0 | 72    | 2.3e-006 | 1    | U | <b>K.NILSSAD</b> YVER.G                         |
| <a href="#">253</a>  | 244 - 254   | 633.8203  | 1265.6261 | 1265.6252 | 0.73  | 0 | 63    | 1.9e-005 | 1    | U | <b>K.NILSSAD</b> YVER.G                         |

**MATRIX SCIENCE MASCOT Search Results**

**Protein View: STX7\_HUMAN**

Syntaxin-7 OS=Homo sapiens GN=STX7 PE=1 SV=4

Database: SwissProt  
 Score: 147  
 Nominal mass (M<sub>r</sub>): 29911  
 Calculated pI: 5.41  
 Taxonomy: [Homo sapiens](#)

Sequence similarity is available as [an NCBI BLAST search of STX7\\_HUMAN against nr.](#)

**Search parameters**

MS data file: 20160626\_cc\_ptexo\_1plh\_2.mgf  
 Enzyme: Trypsin: cuts C-term side of KR unless next residue is P.  
 Fixed modifications: [Carbamidomethyl \(C\)](#)  
 Variable modifications: [Phospho \(ST\)](#), [Oxidation \(M\)](#)

**Protein sequence coverage: 10%**

Matched peptides shown in **bold red**.

```

1 MSYTPGVGGD PAQLAQRIS NIQRITQCSV EIQRTLNQLG TFQDSPELRQ
51 QLQQRQQYIN QLAKETDKYI KEFGSLPTTP SEQRQRKIQR DRLVAEFTTS
101 LINFQKVRQQA AAREKEEFA RVRASSRVSG SPFEDSSKER NLVSNESQDQ
151 FQVQVQDEEI TEDDLRLIHE RESSIRQLEA DIMDINEIFK DLGMMIHEQG
201 DVIDSIEANV ENAEVHVQQA NQQLSRAADY QRKSRKILCI IILILVIGVA
251 IISLIWGLN H
  
```

Unformatted sequence string: [261 residues](#) (for pasting into other applications).

Sort peptides by  Residue Number  Increasing Mass  Decreasing Mass

Show predicted peptides also

| Query                 | Start - End | Observed | Mr (expt) | Mr (calc) | ppm   | M | Score | Expect   | Rank | U | Peptide             |
|-----------------------|-------------|----------|-----------|-----------|-------|---|-------|----------|------|---|---------------------|
| <a href="#">#1801</a> | 35 - 49     | 834.9308 | 1667.8471 | 1667.8479 | -0.43 | 0 | 56    | 1.8e-005 | 1    | U | R.TLNQLGTFQDSPELR.Q |
| <a href="#">#1802</a> | 35 - 49     | 834.9308 | 1667.8471 | 1667.8479 | -0.43 | 0 | 73    | 7.6e-007 | 1    | U | R.TLNQLGTFQDSPELR.Q |
| <a href="#">#1803</a> | 35 - 49     | 834.9308 | 1667.8471 | 1667.8479 | -0.43 | 0 | 34    | 0.0017   | 1    | U | R.TLNQLGTFQDSPELR.Q |
| <a href="#">#1304</a> | 72 - 84     | 724.8561 | 1447.6977 | 1447.6943 | 2.35  | 0 | 33    | 0.006    | 1    | U | K.EFGSLPTTPSEQR.Q   |
| <a href="#">#1305</a> | 72 - 84     | 724.8561 | 1447.6977 | 1447.6943 | 2.35  | 0 | 38    | 0.0012   | 1    | U | K.EFGSLPTTPSEQR.Q   |

**MATRIX SCIENCE MASCOT Search Results**

**Protein View: STX12\_HUMAN**

Syntaxin-12 OS=Homo sapiens GN=STX12 PE=1 SV=1

Database: SwissProt  
 Score: 137  
 Nominal mass (M<sub>r</sub>): 31736  
 Calculated pI: 5.45  
 Taxonomy: [Homo sapiens](#)

Sequence similarity is available as [an NCBI BLAST search of STX12\\_HUMAN against nr.](#)

**Search parameters**

MS data file: 20160628\_cc\_ptero\_1plh\_2.mgf  
 Enzyme: Trypsin: cuts C-term side of KR unless next residue is P.  
 Fixed modifications: [Carbamidomethyl \(C\)](#)  
 Variable modifications: [Phospho \(ST\)](#), [Oxidation \(M\)](#)

**Protein sequence coverage: 10%**

Matched peptides shown in **bold red**.

```

1 MSYGFPLMYR NPGFSGPQLR DFSSIIQTCS GNIQRISQAT AQIKNLMSQL
51 GTRQDSSKLQ ENLQQLQHST NQLAKETNEL LKELGSLPLP LSTSEQRQQR
101 LQKERLMDNF SAALNNTQAV QRRVSEKEKE SIARARAGSR LSAEERQREE
151 QLVSFDSHEE WNMQMSQEDE VAITEQDLEL IKERETAIRQ LEADILDVNG
201 IFRDLAMMIH DQGDLIDSIE ANVESSEVHV ERATEQLQRA AYYQKKSRKK
251 MCILVLVLSV IILILGLIIV LVYKTK
  
```

Unformatted sequence string: [276 residues](#) (for pasting into other applications).

Sort peptides by  Residue Number  Increasing Mass  Decreasing Mass

Show predicted peptides also

| Query                | Start - End | Observed | Mr (expt) | Mr (calc) | ppm  | M | Score | Expect   | Rank | U | Peptide             |
|----------------------|-------------|----------|-----------|-----------|------|---|-------|----------|------|---|---------------------|
| <a href="#">1888</a> | 21 - 35     | 863.4171 | 1724.8196 | 1724.8152 | 2.53 | 0 | 72    | 2.3e-006 | 1    | U | R.DFSSIIQTCSGNIQR.I |
| <a href="#">1889</a> | 21 - 35     | 863.4171 | 1724.8196 | 1724.8152 | 2.53 | 0 | 78    | 6e-007   | 1    | U | R.DFSSIIQTCSGNIQR.I |
| <a href="#">1739</a> | 83 - 97     | 813.9475 | 1625.8805 | 1625.8624 | 11.1 | 0 | 22    | 0.0081   | 1    | U | K.ELGSLPLPLSTSEQR.Q |
| <a href="#">1740</a> | 83 - 97     | 813.9475 | 1625.8805 | 1625.8624 | 11.1 | 0 | 32    | 0.0032   | 1    | U | K.ELGSLPLPLSTSEQR.Q |

**MATRIX SCIENCE MASCOT Search Results**

**Protein View: STX6\_HUMAN**

Syntaxin-6 OS=Homo sapiens GN=STX6 PE=1 SV=1

Database: SwissProt  
 Score: 99  
 Nominal mass (M<sub>r</sub>): 29215  
 Calculated pI: 4.84  
 Taxonomy: [Homo sapiens](#)

Sequence similarity is available as [an NCBI BLAST search of STX6\\_HUMAN against nr.](#)

**Search parameters**

MS data file: 20160628\_cc\_ptero\_1plh\_2.mgf  
 Enzyme: Trypsin: cuts C-term side of KR unless next residue is P.  
 Fixed modifications: [Carbamidomethyl \(C\)](#)  
 Variable modifications: [Phospho \(ST\)](#), [Oxidation \(M\)](#)

**Protein sequence coverage: 9%**

Matched peptides shown in **bold red**.

```

1 MSMEDEFFVY RGEVQRAVNT AQGLFQRWTE LLQDPSTATR EEIDWTINEL
51 RNNLRSEIWD LEDLDETISI VEANFRKFNL DATELSIRKA FITSTRQVVR
101 DMKDKMSTSS VQALAEKRNQ QALLGDSGSQ NWSTGTIDKY GRLDRELQRA
151 NSHFIEEQQA QQQLIVEQQD EQLELVSGSI GVLKMSQRI GGELEEQAVM
201 LEDFSHELES TQSRLDNVMK KLAKVSHMIS DRRQWCAIAI LFAVLLVLI
251 LFLVL
  
```

Unformatted sequence string: [255 residues](#) (for pasting into other applications).

Sort peptides by  Residue Number  Increasing Mass  Decreasing Mass

Show predicted peptides also

| Query                | Start - End | Observed | Mr(expt)  | Mr(calc)  | ppm   | M | Score | Expect   | Rank | U | Peptide           |
|----------------------|-------------|----------|-----------|-----------|-------|---|-------|----------|------|---|-------------------|
| <a href="#">753</a>  | 17 - 27     | 602.8257 | 1203.6369 | 1203.6360 | 0.77  | 0 | 52    | 0.00017  | 1    | U | K.AVNTAQGLFQR.W   |
| <a href="#">759</a>  | 17 - 27     | 602.8257 | 1203.6369 | 1203.6360 | 0.77  | 0 | 65    | 9.3e-006 | 1    | U | K.AVNTAQGLFQR.W   |
| <a href="#">1473</a> | 28 - 40     | 759.3825 | 1516.7505 | 1516.7522 | -1.12 | 0 | 33    | 0.007    | 1    | U | R.WTELLQDPSTATR.E |

## Biological assays

Figure S6: AlphaScreen assay: GST-Acceptor beads, Streptavidin- Donor beads and a GST-Biotin bivalent ligand were incubated in absence (CTR) and in presence of PTS at two different concentrations.

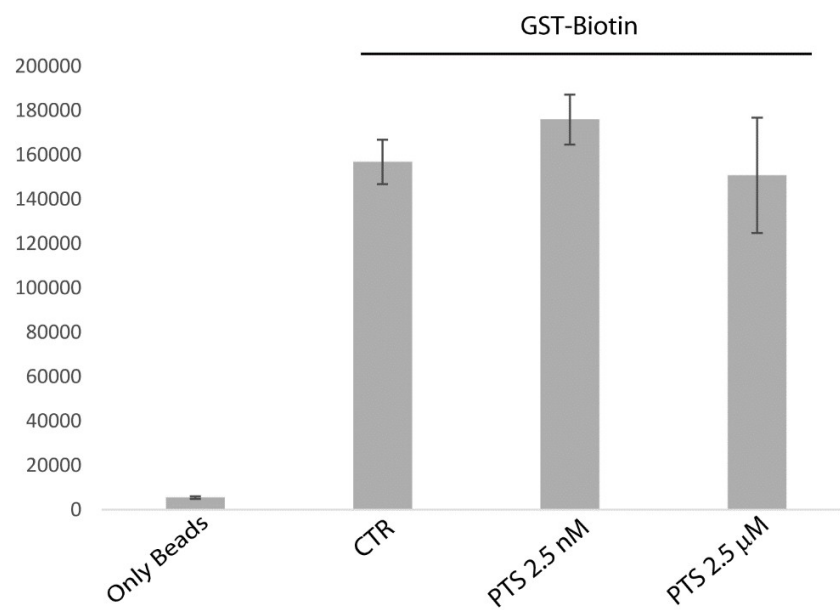

Figure S7: Evaluation of PTS cytotoxic effects were carried out by MTT cell viability assays (at different PTS concentrations, 24h incubation).

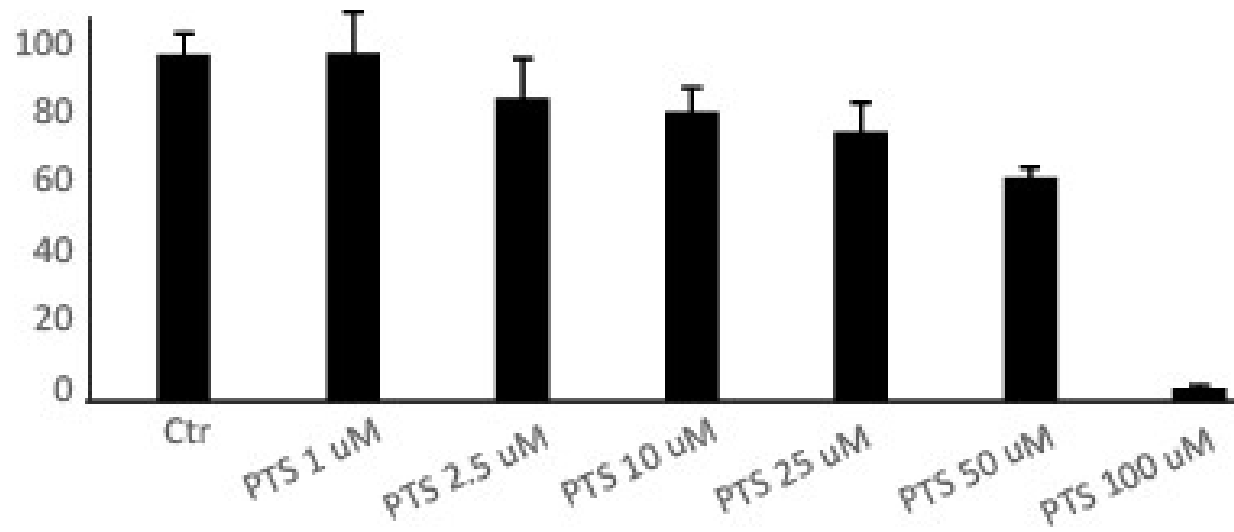



Figure S8: STRING analysis of all the putative PTS partners arranged on the basis of their biological functions.

As reported by McCormack et al. 2013, PTS is well known for its wide biological potential. Its antioxidant activity could be due to PTS interaction with several proteins, such as thioredoxin related transmembrane protein 2 (TMX2), mitochondrial NADH:ubiquinone oxidoreductase complex (NDUFAF1), dehydrogenase/reductase SDR family member 1 (DHRS1), NADH-cytochrome b5 reductase 1 (CYB5R1). Furthermore, the same authors recognized PTS to ameliorate diabetes, and this could match with its action on those proteins involved in vesicles exocytosis as syntaxins (STX), synaptophysin-like protein 1 (SYPL1), and secretory carrier-associated membrane protein 3 (SCAMP3). Finally, PTS is well known to act on metabolic diseases, and this could match with its interaction with those proteins involved in FA metabolism, such as very-long-chain 3-oxoacyl-CoA reductase (HSD17B12), ubiquinone biosynthesis protein COQ9 (COQ9), delta(3,5)-delta(2,4)-dienoyl-CoA isomerase, (ECH1), and sphingolipid delta(4)-desaturase DES1 (DGS1).

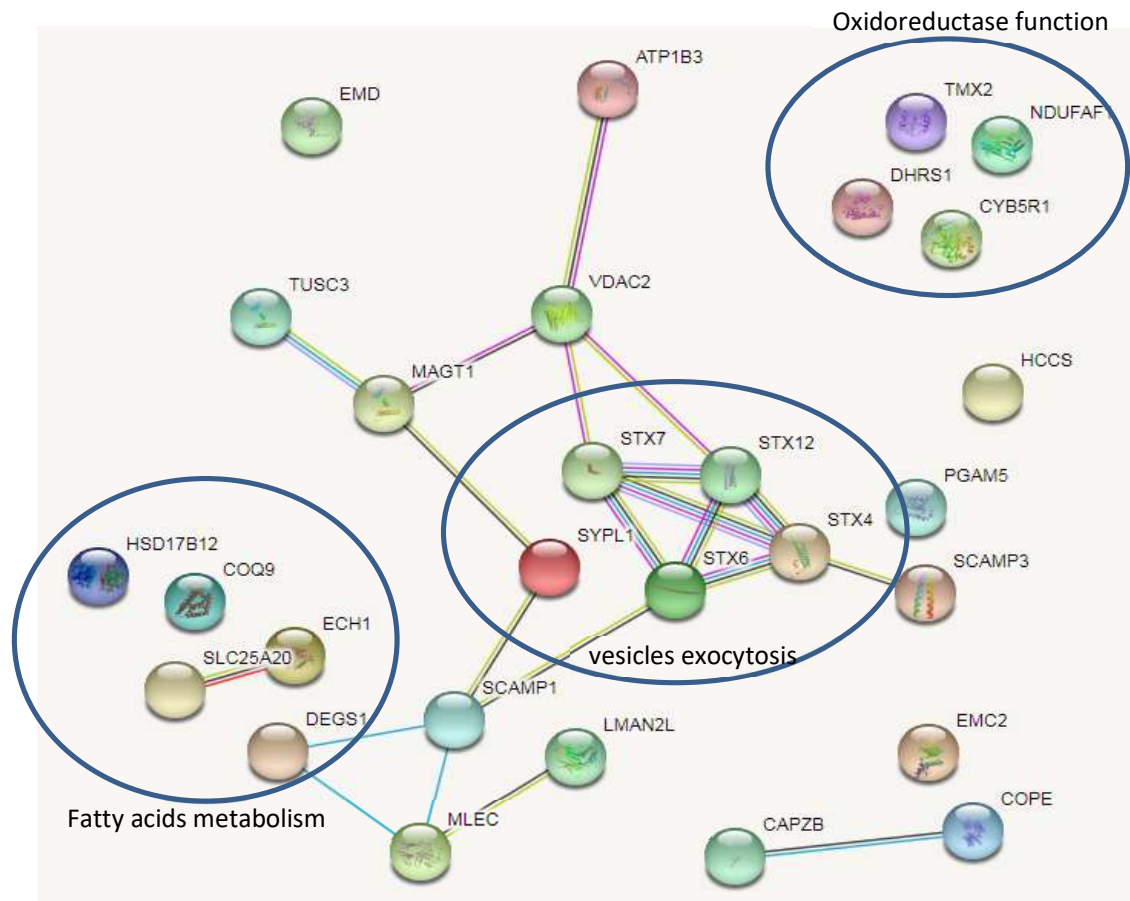

Supplement: molecules-25-02885-s001.pdf [file molecules-25-02885-s001.pdf]
